**SAMPLE META DATA**

| Sample ID      | Country of origin     | Sample Collection Date | Sending Institution | Clinical / Demographic data provided (Y/N) |                           |     |               |             |                | Ct Value | CN Value | Date Received by COVID-19 IMPACT lab | Date sequenced | Date reported to MOH | Date reported to CARPHA | GISAID Upload Date |           |
|----------------|-----------------------|------------------------|---------------------|--------------------------------------------|---------------------------|-----|---------------|-------------|----------------|----------|----------|--------------------------------------|----------------|----------------------|-------------------------|--------------------|-----------|
|                |                       |                        |                     | Age                                        | Date of Onset of Symptoms | Sex | TravelHistory | Town/County | AdditionalData |          |          |                                      |                |                      |                         |                    |           |
| C19IMPACT_0001 | Trinidad and Tobago   | 14-Aug-20              | MoH                 | Y                                          | N                         | N   | Y             | N           | N              | 14.87    |          |                                      | 05-Dec-20      | 04-Jan-21            |                         |                    |           |
| C19IMPACT_0002 | Trinidad and Tobago   | 19-Aug-20              | MoH                 | Y                                          | N                         | N   | Y             | N           | N              | 15.61    |          |                                      | 05-Dec-20      | 04-Jan-21            |                         |                    |           |
| C19IMPACT_0003 | Trinidad and Tobago   | 19-Aug-20              | MoH                 | N                                          | N                         | N   | N             | N           | N              | 34.06    |          |                                      | 05-Dec-20      |                      |                         |                    |           |
| C19IMPACT_0004 | Trinidad and Tobago   | 20-Aug-20              | MoH                 | Y                                          | N                         | N   | Y             | N           | N              | 25.34    |          |                                      | 05-Dec-20      |                      |                         | 21-Jan-22          |           |
| C19IMPACT_0005 | Trinidad and Tobago   | 24-Aug-20              | MoH                 | N                                          | N                         | N   | Y             | N           | N              | 21.55    |          |                                      | 05-Dec-20      | 04-Jan-21            |                         |                    |           |
| C19IMPACT_0006 | Trinidad and Tobago   | 26-Aug-20              | MoH                 | N                                          | N                         | N   | Y             | N           | N              | 16.86    |          |                                      | 05-Dec-20      | 04-Jan-21            |                         |                    |           |
| C19IMPACT_0007 | Trinidad and Tobago   | 27-Aug-20              | MoH                 | N                                          | N                         | N   | N             | N           | N              | 30.29    |          |                                      | 05-Dec-20      |                      |                         |                    |           |
| C19IMPACT_0008 | Trinidad and Tobago   | 29-Aug-20              | MoH                 | Y                                          | N                         | N   | Y             | N           | N              | 14.89    |          |                                      | 05-Dec-20      | 04-Jan-21            |                         |                    |           |
| C19IMPACT_0009 | Trinidad and Tobago   | 02-Sept-20             | MoH                 | N                                          | N                         | N   | Y             | N           | N              | 14.76    |          |                                      | 05-Dec-20      | 04-Jan-21            |                         |                    |           |
| C19IMPACT_0010 | Trinidad and Tobago   | 09-Sept-20             | MoH                 | Y                                          | N                         | N   | Y             | N           | Y              | 17.55    |          |                                      | 05-Dec-20      | 04-Jan-21            |                         |                    |           |
| C19IMPACT_0011 | Trinidad and Tobago   | 14-Sept-20             | MoH                 | Y                                          | N                         | N   | Y             | N           | N              | 14.95    |          |                                      | 05-Dec-20      | 04-Jan-21            |                         |                    |           |
| C19IMPACT_0012 | Trinidad and Tobago   | 01-Aug-20              | MoH                 | Y                                          | N                         | N   | Y             | N           | N              | 19.47    |          |                                      | 16-Dec-20      |                      |                         | 21-Jan-22          |           |
| C19IMPACT_0013 | Trinidad and Tobago   | 10-Aug-20              | MoH                 | Y                                          | N                         | N   | Y             | N           | N              | 18.80    |          |                                      | 16-Dec-20      |                      |                         | 21-Jan-22          |           |
| C19IMPACT_0014 | Trinidad and Tobago   | 18-Aug-20              | MoH                 | Y                                          | N                         | N   | Y             | N           | N              | 18.69    |          |                                      | 16-Dec-20      |                      |                         |                    |           |
| C19IMPACT_0015 | Trinidad and Tobago   | 03-Sept-20             | MoH                 | Y                                          | N                         | N   | Y             | N           | Y              | 17.02    |          |                                      | 16-Dec-20      |                      |                         | 21-Jan-22          |           |
| C19IMPACT_0016 | Trinidad and Tobago   | 13-Sept-20             | MoH                 | Y                                          | N                         | N   | Y             | N           | N              | 20.49    |          |                                      | 16-Dec-20      |                      |                         | 21-Jan-22          |           |
| C19IMPACT_0017 | Trinidad and Tobago   | 14-Sept-20             | MoH                 | N                                          | N                         | N   | N             | N           | N              | 19.92    |          |                                      | 16-Dec-20      |                      |                         | 21-Jan-22          |           |
| C19IMPACT_0018 | Trinidad and Tobago   | 11-Dec-20              | MoH                 | N                                          | N                         | N   | N             | N           | N              |          |          | 01-Dec-20                            | 24-Dec-20      | 04-Jan-21            | 02-Jan-21               | 21-Jan-22          |           |
| C19IMPACT_0019 | Trinidad and Tobago   | 17-Dec-20              | MoH                 | N                                          | N                         | N   | N             | N           | N              |          |          | 01-Dec-20                            | 24-Dec-20      | 04-Jan-21            | 02-Jan-21               |                    |           |
| C19IMPACT_0020 | Trinidad and Tobago   |                        | MoH                 | N                                          | N                         | N   | N             | N           | N              |          |          | 01-Dec-20                            | 24-Dec-20      | 04-Jan-21            | 02-Jan-21               |                    |           |
| C19IMPACT_0021 | Trinidad and Tobago   |                        | MoH                 | N                                          | N                         | N   | N             | N           | N              |          |          | 01-Dec-20                            | 24-Dec-20      | 04-Jan-21            |                         |                    |           |
| C19IMPACT_0022 | Trinidad and Tobago   |                        | MoH                 | N                                          | N                         | N   | N             | N           | N              |          |          | 01-Dec-20                            | 24-Dec-20      | 04-Jan-21            | 02-Jan-21               |                    |           |
| C19IMPACT_0023 | Trinidad and Tobago   |                        | MoH                 | N                                          | N                         | N   | N             | N           | N              |          |          | 01-Dec-20                            | 24-Dec-20      | 04-Jan-21            | 02-Jan-21               |                    |           |
| C19IMPACT_0024 | Trinidad and Tobago   |                        | MoH                 | N                                          | N                         | N   | N             | N           | N              |          |          | 01-Dec-20                            | 24-Dec-20      | 04-Jan-21            | 02-Jan-21               |                    |           |
| C19IMPACT_0025 | Trinidad and Tobago   |                        | MoH                 | N                                          | N                         | N   | N             | N           | N              |          |          | 01-Dec-20                            | 24-Dec-20      | 04-Jan-21            | 02-Jan-21               |                    |           |
| C19IMPACT_0026 | Trinidad and Tobago   |                        | MoH                 | N                                          | N                         | N   | N             | N           | N              |          |          | 01-Dec-20                            | 24-Dec-20      | 04-Jan-21            | 02-Jan-21               |                    |           |
| C19IMPACT_0027 | Trinidad and Tobago   |                        | MoH                 | N                                          | N                         | N   | N             | N           | N              |          |          | 01-Dec-20                            | 24-Dec-20      | 04-Jan-21            | 02-Jan-21               |                    |           |
| C19IMPACT_0028 | Trinidad and Tobago   |                        | MoH                 | N                                          | N                         | N   | N             | N           | N              |          |          | 01-Dec-20                            | 24-Dec-20      | 04-Jan-21            | 02-Jan-21               |                    |           |
| C19IMPACT_0029 | Trinidad and Tobago   |                        | MoH                 | N                                          | N                         | N   | N             | N           | N              |          |          | 01-Dec-20                            | 24-Dec-20      | 04-Jan-21            | 02-Jan-21               |                    |           |
| C19IMPACT_0030 | Trinidad and Tobago   |                        | MoH                 | N                                          | N                         | N   | N             | N           | N              |          |          | 01-Dec-20                            | 24-Dec-20      | 04-Jan-21            | 02-Jan-21               |                    |           |
| C19IMPACT_0031 | Trinidad and Tobago   |                        | MoH                 | N                                          | N                         | N   | N             | N           | N              |          |          | 01-Dec-20                            | 24-Dec-20      | 04-Jan-21            | 02-Jan-21               |                    |           |
| C19IMPACT_0032 | Trinidad and Tobago   |                        | MoH                 | N                                          | N                         | N   | N             | N           | N              |          |          | 01-Dec-20                            | 24-Dec-20      | 04-Jan-21            | 02-Jan-21               |                    |           |
| C19IMPACT_0033 | Trinidad and Tobago   | 23-Jul-20              | CARPHA              | N                                          | N                         | N   | N             | N           | N              | 23.11    |          |                                      | 20-Dec-20      | 28-Dec-20            | 04-Jan-21               | 31-Dec-20          |           |
| C19IMPACT_0034 | Trinidad and Tobago   | 06-Aug-20              | CARPHA              | N                                          | N                         | N   | Y             | N           | N              | 17.73    |          |                                      | 20-Dec-20      | 28-Dec-20            | 04-Jan-21               | 31-Dec-20          |           |
| C19IMPACT_0035 | Trinidad and Tobago   | 21-Aug-20              | CARPHA              | N                                          | N                         | N   | N             | N           | N              | 23.84    |          |                                      | 20-Dec-20      | 28-Dec-20            | 04-Jan-21               | 31-Dec-20          |           |
| C19IMPACT_0036 | Trinidad and Tobago   | 21-Aug-20              | CARPHA              | N                                          | N                         | N   | N             | N           | N              | 18.90    |          |                                      | 20-Dec-20      | 28-Dec-20            | 04-Jan-21               | 31-Dec-20          |           |
| C19IMPACT_0037 | Trinidad and Tobago   | 22-Aug-20              | CARPHA              | N                                          | N                         | N   | Y             | N           | N              | 15.81    |          |                                      | 20-Dec-20      | 28-Dec-20            | 04-Jan-21               | 31-Dec-20          | 06-Apr-21 |
| C19IMPACT_0038 | Trinidad and Tobago   | 22-Aug-20              | CARPHA              | N                                          | N                         | N   | Y             | N           | N              | 21.43    |          |                                      | 20-Dec-20      | 28-Dec-20            | 04-Jan-21               | 31-Dec-20          |           |
| C19IMPACT_0039 | Trinidad and Tobago   | 22-Aug-20              | CARPHA              | N                                          | N                         | N   | N             | N           | N              | 10.57    |          |                                      | 20-Dec-20      | 28-Dec-20            | 04-Jan-21               | 31-Dec-20          |           |
| C19IMPACT_0040 | Trinidad and Tobago   | 22-Aug-20              | CARPHA              | N                                          | N                         | N   | N             | N           | N              | 18.52    |          |                                      | 20-Dec-20      | 28-Dec-20            | 04-Jan-21               | 31-Dec-20          |           |
| C19IMPACT_0041 | Trinidad and Tobago   | 22-Aug-20              | CARPHA              | N                                          | N                         | N   | N             | N           | N              | 22.84    |          |                                      | 20-Dec-20      | 28-Dec-20            | 04-Jan-21               | 31-Dec-20          |           |
| C19IMPACT_0042 | Trinidad and Tobago   | 11-Sept-20             | CARPHA              | N                                          | N                         | N   | N             | N           | N              | 24.41    |          |                                      | 20-Dec-20      | 28-Dec-20            | 04-Jan-21               | 31-Dec-20          |           |
| C19IMPACT_0043 | Trinidad and Tobago   | 11-Sept-20             | CARPHA              | N                                          | N                         | N   | N             | N           | N              | 15.95    |          |                                      | 20-Dec-20      | 28-Dec-20            | 04-Jan-21               | 31-Dec-20          |           |
| C19IMPACT_0044 | Trinidad and Tobago   | 11-Sept-20             | CARPHA              | N                                          | N                         | N   | N             | N           | N              | 21.60    |          |                                      | 20-Dec-20      | 28-Dec-20            | 04-Jan-21               | 31-Dec-20          |           |
| C19IMPACT_0045 | Trinidad and Tobago   | 11-Sept-20             | CARPHA              | N                                          | N                         | N   | N             | N           | N              | 23.87    |          |                                      | 20-Dec-20      | 28-Dec-20            | 04-Jan-21               | 31-Dec-20          |           |
| C19IMPACT_0046 | Trinidad and Tobago   | 11-Sept-20             | CARPHA              | N                                          | N                         | N   | N             | N           | N              | 20.27    |          |                                      | 20-Dec-20      | 28-Dec-20            | 04-Jan-21               | 31-Dec-20          |           |
| C19IMPACT_0047 | Trinidad and Tobago   | 11-Sept-20             | CARPHA              | N                                          | N                         | N   | N             | N           | N              | 21.49    |          |                                      | 20-Dec-20      | 28-Dec-20            | 04-Jan-21               | 31-Dec-20          |           |
| C19IMPACT_0048 | Trinidad and Tobago   | 21-Oct-20              | CARPHA              | N                                          | N                         | N   | N             | N           | N              | 11.98    |          |                                      | 20-Dec-20      | 28-Dec-20            | 04-Jan-21               | 31-Dec-20          |           |
| C19IMPACT_0049 | Trinidad and Tobago   | 27-Oct-20              | CARPHA              | N                                          | N                         | N   | N             | N           | N              | 16.56    |          |                                      | 20-Dec-20      | 28-Dec-20            | 04-Jan-21               | 31-Dec-20          |           |
| C19IMPACT_0050 | Trinidad and Tobago   | 27-Oct-20              | CARPHA              | N                                          | N                         | N   | N             | N           | N              | 22.28    |          |                                      | 20-Dec-20      | 28-Dec-20            | 04-Jan-21               | 31-Dec-20          |           |
| C19IMPACT_0051 | Trinidad and Tobago   | 27-Oct-20              | CARPHA              | N                                          | N                         | N   | N             | N           | N              | 19.62    |          |                                      | 20-Dec-20      | 28-Dec-20            | 04-Jan-21               | 31-Dec-20          |           |
| C19IMPACT_0052 | Trinidad and Tobago   | 25-Nov-20              | CARPHA              | N                                          | N                         | N   | N             | N           | N              | 22.42    |          |                                      | 20-Dec-20      | 28-Dec-20            | 04-Jan-21               | 31-Dec-20          |           |
| C19IMPACT_0053 | Trinidad and Tobago   | 26-Nov-20              | CARPHA              | N                                          | N                         | N   | N             | N           | N              | 22.92    |          |                                      | 20-Dec-20      | 28-Dec-20            | 04-Jan-21               | 31-Dec-20          |           |
| C19IMPACT_0054 | Trinidad and Tobago   | 26-Nov-20              | CARPHA              | N                                          | N                         | N   | N             | N           | N              | 24.36    |          |                                      | 20-Dec-20      | 28-Dec-20            | 04-Jan-21               | 31-Dec-20          |           |
| C19IMPACT_0055 | Trinidad and Tobago   | 26-Nov-20              | CARPHA              | N                                          | N                         | N   | N             | N           | N              | 21.18    |          |                                      | 20-Dec-20      | 28-Dec-20            | 04-Jan-21               | 31-Dec-20          |           |
| C19IMPACT_0056 | Saint Kitts and Nevis | 20-Mar-20              | CARPHA              | N                                          | N                         | N   | N             | N           | N              | 27.15    |          |                                      | 28-Dec-20      | 31-Dec-20            |                         | 02-Jan-21          |           |
| C19IMPACT_0057 | Montserrat            | 25-Mar-20              | CARPHA              | N                                          | N                         | N   | N             | N           | N              | 25.43    |          |                                      | 28-Dec-20      | 31-Dec-20            |                         | 02-Jan-21          |           |
| C19IMPACT_0058 | Saint Kitts and Nevis | 28-Mar-20              | CARPHA              | N                                          | N                         | N   | N             | N           | N              | 26.00    |          |                                      | 28-Dec-20      | 31-Dec-20            |                         | 02-Jan-21          |           |
| C19IMPACT_0059 | Saint Kitts and Nevis | 28-Mar-20              | CARPHA              | N                                          | N                         | N   | N             | N           | N              | 20.90    |          |                                      | 28-Dec-20      | 31-Dec-20            |                         | 02-Jan-21          |           |
| C19IMPACT_0060 | Trinidad and Tobago   | 26-Aug-20              | MoH                 | N                                          | N                         | N   | N             | N           | N              | 14.88    |          |                                      | 31-Dec-20      | 04-Jan-21            |                         |                    |           |

|                |                                  |            |        |   |   |   |   |   |   |       |           |           |           |           |           |  |
|----------------|----------------------------------|------------|--------|---|---|---|---|---|---|-------|-----------|-----------|-----------|-----------|-----------|--|
| C19IMPACT_0061 | Trinidad and Tobago              | 09-Sept-20 | MoH    | Y | N | Y | N | Y | N | 15.06 |           | 31-Dec-20 | 04-Jan-21 |           |           |  |
| C19IMPACT_0062 | Trinidad and Tobago              | 09-Sept-20 | MoH    | Y | N | Y | N | Y | N | 15.06 |           | 31-Dec-20 | 04-Jan-21 |           |           |  |
| C19IMPACT_0063 | Trinidad and Tobago              | 27-Oct-20  | CARPHA | N | N | N | N | N | N | 13.45 | 20-Dec-20 | 31-Dec-20 | 04-Jan-21 | 31-Dec-20 |           |  |
| C19IMPACT_0064 | Antigua and Barbuda              | 28-Oct-20  | CARPHA | N | N | N | N | N | N | 26.49 | 28-Dec-20 | 31-Dec-20 |           | 02-Jan-21 |           |  |
| C19IMPACT_0065 | Antigua and Barbuda              | 29-Oct-20  | CARPHA | N | N | N | N | N | N | 17.16 | 28-Dec-20 | 31-Dec-20 |           | 02-Jan-21 | 02-Jun-21 |  |
| C19IMPACT_0066 | Saint Vincent and the Grenadines | 18-Nov-20  | CARPHA | N | N | N | N | N | N | 21.63 | 28-Dec-20 | 31-Dec-20 |           | 02-Jan-21 |           |  |
| C19IMPACT_0067 | Trinidad and Tobago              | 18-Nov-20  | CARPHA | N | N | N | N | Y | N | 21.48 | 28-Dec-20 | 31-Dec-20 | 04-Jan-21 | 31-Dec-20 |           |  |
| C19IMPACT_0068 | Trinidad and Tobago              | 26-Nov-20  | CARPHA | N | N | N | N | Y | N | 13.06 | 28-Dec-20 | 31-Dec-20 | 04-Jan-21 | 31-Dec-20 |           |  |
| C19IMPACT_0069 | Trinidad and Tobago              | 11-Dec-20  | CARPHA | N | N | N | N | N | N | 13.72 | 28-Dec-20 | 31-Dec-20 | 04-Jan-21 | 31-Dec-20 |           |  |
| C19IMPACT_0070 | Trinidad and Tobago              | 12-Dec-20  | CARPHA | N | N | N | N | N | N | 15.59 | 28-Dec-20 | 31-Dec-20 | 04-Jan-21 | 31-Dec-20 |           |  |
| C19IMPACT_0071 | Trinidad and Tobago              | 17-Dec-20  | CARPHA | N | N | N | N | Y | N | 19.46 | 28-Dec-20 | 31-Dec-20 | 04-Jan-21 | 31-Dec-20 |           |  |
| C19IMPACT_0072 | Saint Vincent and the Grenadines | 18-Dec-20  | CARPHA | N | N | N | N | N | N | 25.52 | 28-Dec-20 | 31-Dec-20 |           | 02-Jan-21 |           |  |
| C19IMPACT_0073 | Jamaica                          | 21-Dec-20  | CARPHA | N | N | N | N | N | N | 25.10 | 30-Dec-20 | 31-Dec-20 |           | 02-Jan-21 |           |  |
| C19IMPACT_0074 | Jamaica                          | 21-Dec-20  | CARPHA | N | N | N | N | N | Y | 26.97 | 30-Dec-20 | 31-Dec-20 |           | 02-Jan-21 |           |  |
| C19IMPACT_0075 | Jamaica                          | 21-Dec-20  | CARPHA | N | N | N | N | N | N | 17.28 | 30-Dec-20 | 31-Dec-20 |           | 02-Jan-21 |           |  |
| C19IMPACT_0076 | Jamaica                          | 21-Dec-20  | CARPHA | N | N | N | N | N | N | 21.91 | 30-Dec-20 | 31-Dec-20 |           | 02-Jan-21 |           |  |
| C19IMPACT_0077 | Jamaica                          | 21-Dec-20  | CARPHA | N | N | N | N | N | N | 25.20 | 30-Dec-20 | 31-Dec-20 |           | 02-Jan-21 |           |  |
| C19IMPACT_0078 | Trinidad and Tobago              |            | MoH    | N | N | N | N | N | Y |       |           | 31-Dec-20 |           |           |           |  |
| C19IMPACT_0079 | Trinidad and Tobago              | 13-Nov-20  | MoH    | N | N | N | N | N | Y |       | 01-Dec-20 | 08-Jan-21 |           |           | 21-Jan-22 |  |
| C19IMPACT_0080 | Trinidad and Tobago              | 18-Nov-20  | MoH    | N | N | N | N | N | Y |       | 01-Dec-20 | 08-Jan-21 |           |           |           |  |
| C19IMPACT_0081 | Trinidad and Tobago              | 18-Nov-20  | MoH    | N | N | N | N | N | Y |       | 01-Dec-20 | 08-Jan-21 |           |           | 21-Jan-22 |  |
| C19IMPACT_0082 | Trinidad and Tobago              | 18-Nov-20  | MoH    | N | N | N | N | N | Y |       | 01-Dec-20 | 08-Jan-21 |           |           |           |  |
| C19IMPACT_0083 | Trinidad and Tobago              | 18-Nov-20  | MoH    | N | N | N | N | N | Y |       | 01-Dec-20 | 08-Jan-21 |           |           | 21-Jan-22 |  |
| C19IMPACT_0084 | Trinidad and Tobago              | 18-Nov-20  | MoH    | N | N | N | N | N | Y |       | 01-Dec-20 | 08-Jan-21 |           |           | 21-Jan-22 |  |
| C19IMPACT_0085 | Trinidad and Tobago              | 18-Nov-20  | MoH    | N | N | N | N | N | Y |       | 01-Dec-20 | 08-Jan-21 |           |           | 21-Jan-22 |  |
| C19IMPACT_0086 | Trinidad and Tobago              | 18-Nov-20  | MoH    | N | N | N | N | N | Y |       | 01-Dec-20 | 08-Jan-21 |           |           | 21-Jan-22 |  |
| C19IMPACT_0087 | Trinidad and Tobago              | 20-Nov-20  | MoH    | N | N | N | N | N | Y |       | 01-Dec-20 | 08-Jan-21 |           |           | 21-Jan-22 |  |
| C19IMPACT_0088 | Trinidad and Tobago              | 20-Nov-20  | MoH    | N | N | N | N | N | Y |       | 01-Dec-20 | 08-Jan-21 |           |           | 21-Jan-22 |  |
| C19IMPACT_0089 | Trinidad and Tobago              | 20-Nov-20  | MoH    | N | N | N | N | N | Y |       | 01-Dec-20 | 08-Jan-21 |           |           | 21-Jan-22 |  |
| C19IMPACT_0090 | Trinidad and Tobago              | 20-Nov-20  | MoH    | N | N | N | N | N | Y |       | 01-Dec-20 | 08-Jan-21 |           |           | 21-Jan-22 |  |
| C19IMPACT_0091 | Trinidad and Tobago              | 20-Nov-20  | MoH    | N | N | N | N | N | Y |       | 01-Dec-20 | 08-Jan-21 |           |           | 21-Jan-22 |  |
| C19IMPACT_0092 | Trinidad and Tobago              | 20-Nov-20  | MoH    | N | N | N | N | N | Y |       | 01-Dec-20 | 08-Jan-21 |           |           | 21-Jan-22 |  |
| C19IMPACT_0093 | Trinidad and Tobago              | 20-Nov-20  | MoH    | N | N | N | N | N | Y |       | 01-Dec-20 | 08-Jan-21 |           |           | 21-Jan-22 |  |
| C19IMPACT_0094 | Trinidad and Tobago              | 20-Nov-20  | MoH    | N | N | N | N | N | Y |       | 01-Dec-20 | 08-Jan-21 |           |           | 21-Jan-22 |  |
| C19IMPACT_0095 | Trinidad and Tobago              | 20-Nov-20  | MoH    | N | N | N | N | N | Y |       | 01-Dec-20 | 08-Jan-21 |           |           |           |  |
| C19IMPACT_0096 | Trinidad and Tobago              |            | MoH    | N | N | N | N | N | Y |       | 01-Dec-20 | 08-Jan-21 |           |           |           |  |
| C19IMPACT_0097 | Trinidad and Tobago              |            | MoH    | N | N | N | N | N | Y |       | 01-Dec-20 | 08-Jan-21 |           |           |           |  |
| C19IMPACT_0098 | Trinidad and Tobago              |            | MoH    | N | N | N | N | N | Y |       | 01-Dec-20 | 08-Jan-21 |           |           |           |  |
| C19IMPACT_0099 | Trinidad and Tobago              |            | MoH    | N | N | N | N | N | Y |       | 01-Dec-20 | 08-Jan-21 |           |           |           |  |
| C19IMPACT_0100 | Trinidad and Tobago              |            | MoH    | N | N | N | N | N | Y |       | 01-Dec-20 | 08-Jan-21 |           |           |           |  |
| C19IMPACT_0101 | Trinidad and Tobago              |            | MoH    | N | N | N | N | N | Y |       | 01-Dec-20 | 08-Jan-21 |           |           |           |  |
| C19IMPACT_0102 | tbcb                             | 15-Aug-20  | CARPHA | N | N | N | N | N | N | 22.94 | 24-Dec-20 | 19-Jan-21 |           | 22-Jan-21 |           |  |
| C19IMPACT_0103 | Trinidad and Tobago              | 29-Aug-20  | MoH    | N | N | N | N | N | N |       |           | 19-Jan-21 |           |           | 21-Jan-22 |  |
| C19IMPACT_0104 | Trinidad and Tobago              | 30-Aug-20  | MoH    | Y | N | Y | N | Y | N | 26.65 |           | 19-Jan-21 |           |           | 21-Jan-22 |  |
| C19IMPACT_0105 | Trinidad and Tobago              | 14-Sept-20 | MoH    | N | N | N | N | N | N |       | 01-Dec-20 | 19-Jan-21 |           |           | 21-Jan-22 |  |
| C19IMPACT_0106 | Trinidad and Tobago              | 14-Sept-20 | MoH    | N | N | N | N | N | N |       | 01-Dec-20 | 19-Jan-21 |           |           | 21-Jan-22 |  |
| C19IMPACT_0107 | Trinidad and Tobago              | 14-Sept-20 | MoH    | N | N | N | N | N | N |       | 01-Dec-20 | 19-Jan-21 |           |           | 21-Jan-22 |  |
| C19IMPACT_0108 | tbcb                             | 27-Oct-20  | CARPHA | N | N | N | N | N | N | 30.68 | 01-Dec-20 | 19-Jan-21 |           | 22-Jan-21 |           |  |
| C19IMPACT_0109 | Trinidad and Tobago              | 04-Dec-20  | MoH    | N | N | N | N | N | N |       | 01-Dec-20 | 19-Jan-21 |           |           | 21-Jan-22 |  |
| C19IMPACT_0110 | Trinidad and Tobago              | 04-Dec-20  | MoH    | N | N | N | N | N | N |       | 01-Dec-20 | 19-Jan-21 |           |           | 21-Jan-22 |  |
| C19IMPACT_0111 | Jamaica                          | 21-Dec-20  | CARPHA | N | N | N | N | N | Y | 20.50 | 30-Dec-20 | 19-Jan-21 |           | 02-Jan-21 | 21-Jan-22 |  |
| C19IMPACT_0112 | Trinidad and Tobago              |            | MoH    | N | N | N | N | N | N |       | 01-Dec-20 | 19-Jan-21 |           |           |           |  |
| C19IMPACT_0113 | Trinidad and Tobago              |            | CARPHA | N | N | N | N | N | N |       | 18-Jan-21 | 19-Jan-21 | 21-Jan-21 | 22-Jan-21 |           |  |
| C19IMPACT_0114 | tbcb                             |            | CARPHA | N | N | N | N | N | N | 24.07 | 24-Dec-20 | 19-Jan-21 |           | 22-Jan-21 |           |  |
| C19IMPACT_0115 | tbcb                             |            | CARPHA | N | N | N | N | N | N | 21.78 | 24-Dec-20 | 19-Jan-21 |           | 22-Jan-21 |           |  |
| C19IMPACT_0116 | tbcb                             |            | CARPHA | N | N | N | N | N | N | 17.29 | 24-Dec-20 | 19-Jan-21 |           | 22-Jan-21 |           |  |
| C19IMPACT_0117 | tbcb                             |            | CARPHA | N | N | N | N | N | N | 19.79 | 24-Dec-20 | 19-Jan-21 |           | 22-Jan-21 |           |  |
| C19IMPACT_0118 | tbcb                             |            | CARPHA | N | N | N | N | N | N | 22.60 | 24-Dec-20 | 19-Jan-21 |           | 22-Jan-21 |           |  |
| C19IMPACT_0119 | tbcb                             |            | CARPHA | N | N | N | N | N | N | 17.92 | 24-Dec-20 | 19-Jan-21 |           | 22-Jan-21 |           |  |
| C19IMPACT_0120 | tbcb                             |            | CARPHA | N | N | N | N | N | N | 19.92 | 24-Dec-20 | 19-Jan-21 |           | 22-Jan-21 |           |  |
| C19IMPACT_0121 | tbcb                             |            | CARPHA | N | N | N | N | N | N | 22.89 | 24-Dec-20 | 19-Jan-21 |           | 22-Jan-21 |           |  |
| C19IMPACT_0122 | tbcb                             |            | CARPHA | N | N | N | N | N | N | 29.14 | 24-Dec-20 | 19-Jan-21 |           | 22-Jan-21 |           |  |
| C19IMPACT_0123 | tbcb                             |            | CARPHA | N | N | N | N | N | N | 34.76 | 24-Dec-20 | 19-Jan-21 |           | 22-Jan-21 |           |  |
| C19IMPACT_0124 | tbcb                             |            | CARPHA | N | N | N | N | N | N | 21.35 | 24-Dec-20 | 19-Jan-21 |           | 22-Jan-21 |           |  |

|                |                        |            |        |   |   |   |   |   |   |       |  |           |           |           |  |           |           |
|----------------|------------------------|------------|--------|---|---|---|---|---|---|-------|--|-----------|-----------|-----------|--|-----------|-----------|
| C19IMPACT_0125 | Trinidad and Tobago    |            | MoH    | N | N | N | N | N | N |       |  | 01-Dec-20 | 21-Jan-21 |           |  |           |           |
| C19IMPACT_0126 | Trinidad and Tobago    |            | MoH    | N | N | N | N | N | N |       |  | 01-Dec-20 | 21-Jan-21 |           |  |           |           |
| C19IMPACT_0127 | Trinidad and Tobago    |            | MoH    | N | N | N | N | N | Y |       |  | 01-Dec-20 | 21-Jan-21 | 29-Jan-21 |  |           |           |
| C19IMPACT_0128 | Trinidad and Tobago    | 31-Aug-20  | MoH    | N | N | N | N | N | N | 23.02 |  |           | 21-Jan-21 |           |  |           | 21-Jan-22 |
| C19IMPACT_0129 | Cayman Islands         | 09-Dec-20  | CARPHA | N | N | N | N | N | N | 22.33 |  | 21-Jan-21 | 21-Jan-21 |           |  | 22-Jan-21 |           |
| C19IMPACT_0130 | Cayman Islands         | 11-Dec-20  | CARPHA | N | N | N | N | N | N | 15.43 |  | 21-Jan-21 | 21-Jan-21 |           |  | 22-Jan-21 | 21-Jan-22 |
| C19IMPACT_0131 | Cayman Islands         | 15-Dec-20  | CARPHA | N | N | N | N | N | N | 20.31 |  | 21-Jan-21 | 21-Jan-21 |           |  | 22-Jan-21 | 21-Jan-22 |
| C19IMPACT_0132 | Cayman Islands         | 15-Dec-20  | CARPHA | N | N | N | N | N | N | 22.86 |  | 21-Jan-21 | 21-Jan-21 |           |  | 22-Jan-21 |           |
| C19IMPACT_0133 | Cayman Islands         | 15-Dec-20  | CARPHA | N | N | N | N | N | N | 14.82 |  | 21-Jan-21 | 21-Jan-21 |           |  | 22-Jan-21 | 21-Jan-22 |
| C19IMPACT_0134 | Saint Lucia            | 17-Dec-20  | CARPHA | N | N | N | N | N | N | 14.51 |  | 21-Jan-21 | 21-Jan-21 |           |  | 22-Jan-21 |           |
| C19IMPACT_0135 | Saint Lucia            | 23-Dec-20  | CARPHA | N | N | N | N | N | N | 16.18 |  | 21-Jan-21 | 21-Jan-21 |           |  | 22-Jan-21 |           |
| C19IMPACT_0136 | Saint Lucia            | 23-Dec-20  | CARPHA | N | N | N | N | N | N | 19.65 |  | 21-Jan-21 | 21-Jan-21 |           |  | 22-Jan-21 | 21-Jan-22 |
| C19IMPACT_0137 | Saint Lucia            | 23-Dec-20  | CARPHA | N | N | N | N | N | N | 20.53 |  | 21-Jan-21 | 21-Jan-21 |           |  | 22-Jan-21 | 21-Jan-22 |
| C19IMPACT_0138 | Saint Lucia            | 23-Dec-20  | CARPHA | N | N | N | N | N | N | 21.34 |  | 21-Jan-21 | 21-Jan-21 |           |  | 22-Jan-21 |           |
| C19IMPACT_0139 | Barbados               | 24-Dec-20  | CARPHA | N | N | N | N | N | N | 18.98 |  | 21-Jan-21 | 21-Jan-21 |           |  | 22-Jan-21 |           |
| C19IMPACT_0140 | Saint Lucia            | 26-Dec-20  | CARPHA | N | N | N | N | N | N | 13.98 |  | 21-Jan-21 | 21-Jan-21 |           |  | 22-Jan-21 |           |
| C19IMPACT_0141 | Barbados               | 30-Dec-20  | CARPHA | N | N | N | N | N | N | 19.69 |  | 21-Jan-21 | 21-Jan-21 |           |  | 22-Jan-21 |           |
| C19IMPACT_0142 | Barbados               | 30-Dec-20  | CARPHA | N | N | N | N | N | N | 24.50 |  | 21-Jan-21 | 21-Jan-21 |           |  | 22-Jan-21 |           |
| C19IMPACT_0143 | Barbados               | 31-Dec-20  | CARPHA | N | N | N | N | N | N | 20.35 |  | 21-Jan-21 | 21-Jan-21 |           |  | 22-Jan-21 |           |
| C19IMPACT_0144 | Barbados               | 31-Dec-20  | CARPHA | N | N | N | N | N | N | 20.45 |  | 21-Jan-21 | 21-Jan-21 |           |  | 22-Jan-21 | 21-Jan-22 |
| C19IMPACT_0145 | Barbados               | 02-Jan-21  | CARPHA | N | N | N | N | N | N | 22.65 |  | 21-Jan-21 | 21-Jan-21 |           |  | 22-Jan-21 | 21-Jan-22 |
| C19IMPACT_0146 | Barbados               | 03-Jan-21  | CARPHA | N | N | N | N | N | N | 14.70 |  | 21-Jan-21 | 21-Jan-21 |           |  | 22-Jan-21 |           |
| C19IMPACT_0147 | Cayman Islands         | 03-Jan-21  | CARPHA | N | N | N | N | N | N | 16.01 |  | 21-Jan-21 | 21-Jan-21 |           |  | 22-Jan-21 | 21-Jan-22 |
| C19IMPACT_0148 | British Virgin Islands | 03-Jan-21  | CARPHA | N | N | N | N | N | N | 16.12 |  | 22-Jan-21 | 23-Jan-21 |           |  | 25-Jan-21 |           |
| C19IMPACT_0149 | British Virgin Islands | 03-Jan-21  | CARPHA | N | N | N | N | N | N | 24.35 |  | 22-Jan-21 | 23-Jan-21 |           |  | 25-Jan-21 | 21-Jan-22 |
| C19IMPACT_0150 | British Virgin Islands | 05-Jan-21  | CARPHA | N | N | N | N | N | N | 24.31 |  | 22-Jan-21 | 23-Jan-21 |           |  | 25-Jan-21 |           |
| C19IMPACT_0151 | British Virgin Islands | 05-Jan-21  | CARPHA | N | N | N | N | N | N | 15.05 |  | 22-Jan-21 | 23-Jan-21 |           |  | 25-Jan-21 |           |
| C19IMPACT_0152 | British Virgin Islands | 06-Jan-21  | CARPHA | N | N | N | N | N | N | 21.93 |  | 22-Jan-21 | 23-Jan-21 |           |  | 25-Jan-21 |           |
| C19IMPACT_0153 | British Virgin Islands | 07-Jan-21  | CARPHA | N | N | N | N | N | N | 16.43 |  | 22-Jan-21 | 23-Jan-21 |           |  | 25-Jan-21 |           |
| C19IMPACT_0154 | British Virgin Islands | 10-Jan-21  | CARPHA | N | N | N | N | N | N | 25.15 |  | 22-Jan-21 | 23-Jan-21 |           |  | 25-Jan-21 |           |
| C19IMPACT_0155 | Trinidad and Tobago    | 18-Jan-21  | MoH    | N | N | N | N | N | N |       |  | 22-Jan-21 | 24-Jan-21 | 29-Jan-21 |  |           |           |
| C19IMPACT_0156 | Guyana                 | 27-Mar-20  | CARPHA | N | N | N | N | N | N | 17.99 |  | 26-Jan-21 | 27-Jan-21 |           |  | 28-Jan-21 | 23-May-21 |
| C19IMPACT_0157 | Guyana                 | 07-Sept-20 | CARPHA | N | N | N | N | N | N | 12.35 |  | 26-Jan-21 | 27-Jan-21 |           |  | 28-Jan-21 | 11-Jun-21 |
| C19IMPACT_0158 | Trinidad and Tobago    | 07-Sept-20 | MoH    | N | N | N | N | Y | N |       |  | 01-Dec-20 | 27-Jan-21 | 29-Jan-21 |  |           | 23-May-21 |
| C19IMPACT_0159 | Guyana                 | 11-Sept-20 | CARPHA | N | N | N | N | N | N | 24.97 |  | 26-Jan-21 | 27-Jan-21 |           |  | 28-Jan-21 | 11-Jun-21 |
| C19IMPACT_0160 | Guyana                 | 11-Sept-20 | CARPHA | N | N | N | N | N | N | 16.06 |  | 26-Jan-21 | 27-Jan-21 |           |  | 28-Jan-21 | 23-May-21 |
| C19IMPACT_0161 | Guyana                 | 11-Sept-20 | CARPHA | N | N | N | N | N | N | 11.37 |  | 26-Jan-21 | 27-Jan-21 |           |  | 28-Jan-21 | 11-Jun-21 |
| C19IMPACT_0162 | Trinidad and Tobago    | 20-Nov-20  | MoH    | N | N | N | N | Y | N |       |  | 01-Dec-20 | 27-Jan-21 | 29-Jan-21 |  |           | 23-May-21 |
| C19IMPACT_0163 | Guyana                 | 29-Dec-20  | CARPHA | N | N | N | N | N | N | 15.75 |  | 26-Jan-21 | 27-Jan-21 |           |  | 28-Jan-21 | 11-Jun-21 |
| C19IMPACT_0164 | Guyana                 | 01-Jan-21  | CARPHA | N | N | N | N | N | N | 21.83 |  | 26-Jan-21 | 27-Jan-21 |           |  | 28-Jan-21 | 11-Jun-21 |
| C19IMPACT_0165 | Guyana                 | 03-Jan-21  | CARPHA | N | N | N | N | N | N | 18.29 |  | 26-Jan-21 | 27-Jan-21 |           |  | 28-Jan-21 | 11-Jun-21 |
| C19IMPACT_0166 | Grenada                | 06-Jan-21  | CARPHA | N | N | N | N | N | N | 24.29 |  | 26-Jan-21 | 27-Jan-21 |           |  | 28-Jan-21 | 11-Jun-21 |
| C19IMPACT_0167 | Grenada                | 06-Jan-21  | CARPHA | N | N | N | N | N | N | 22.36 |  | 26-Jan-21 | 27-Jan-21 |           |  | 28-Jan-21 | 11-Jun-21 |
| C19IMPACT_0168 | Grenada                | 06-Jan-21  | CARPHA | N | N | N | N | N | N | 21.22 |  | 26-Jan-21 | 27-Jan-21 |           |  | 28-Jan-21 | 11-Jun-21 |
| C19IMPACT_0169 | Grenada                | 06-Jan-21  | CARPHA | N | N | N | N | N | N | 20.90 |  | 26-Jan-21 | 27-Jan-21 |           |  | 28-Jan-21 | 11-Jun-21 |
| C19IMPACT_0170 | Grenada                | 17-Jan-21  | CARPHA | N | N | N | N | N | N | 15.97 |  | 26-Jan-21 | 27-Jan-21 |           |  | 28-Jan-21 | 11-Jun-21 |
| C19IMPACT_0171 | Guyana                 | 18-Jan-21  | CARPHA | N | N | N | N | N | N | 12.18 |  | 26-Jan-21 | 27-Jan-21 |           |  | 28-Jan-21 | 11-Jun-21 |
| C19IMPACT_0172 | Guyana                 | 18-Jan-21  | CARPHA | N | N | N | N | N | N | 22.49 |  | 26-Jan-21 | 27-Jan-21 |           |  | 28-Jan-21 | 11-Jun-21 |
| C19IMPACT_0173 | Trinidad and Tobago    |            | MoH    | N | N | N | N | N | N |       |  | 01-Dec-20 | 27-Jan-21 | 29-Jan-21 |  |           |           |
| C19IMPACT_0174 | Trinidad and Tobago    |            | MoH    | N | N | N | N | N | N |       |  | 01-Dec-20 | 27-Jan-21 | 29-Jan-21 |  |           |           |
| C19IMPACT_0175 | Trinidad and Tobago    |            | MoH    | N | N | N | N | N | N |       |  | 01-Dec-20 | 27-Jan-21 | 29-Jan-21 |  |           |           |
| C19IMPACT_0176 | Trinidad and Tobago    |            | MoH    | N | N | N | N | N | N |       |  | 01-Dec-20 | 27-Jan-21 | 29-Jan-21 |  |           |           |
| C19IMPACT_0177 | Trinidad and Tobago    |            | MoH    | N | N | N | N | N | N |       |  | 01-Dec-20 | 27-Jan-21 | 29-Jan-21 |  |           |           |
| C19IMPACT_0178 | Trinidad and Tobago    |            | MoH    | N | N | N | N | N | N |       |  | 01-Dec-20 | 27-Jan-21 | 29-Jan-21 |  |           |           |
| C19IMPACT_0179 | Trinidad and Tobago    | 05-Aug-20  | MoH    | N | N | N | N | Y | N | 27.02 |  |           | 28-Jan-21 | 29-Jan-21 |  |           | 21-Jan-22 |
| C19IMPACT_0180 | Saint Lucia            | 13-Jan-21  | CARPHA | N | N | N | N | N | N | 13.13 |  | 27-Jan-21 | 28-Jan-21 |           |  | 29-Jan-21 |           |
| C19IMPACT_0181 | Saint Lucia            | 14-Jan-21  | CARPHA | N | N | N | N | N | N | 13.62 |  | 27-Jan-21 | 28-Jan-21 |           |  | 29-Jan-21 |           |
| C19IMPACT_0182 | Saint Lucia            | 14-Jan-21  | CARPHA | N | N | N | N | N | N | 13.45 |  | 27-Jan-21 | 28-Jan-21 |           |  | 29-Jan-21 |           |
| C19IMPACT_0183 | Saint Lucia            | 16-Jan-21  | CARPHA | N | N | N | N | N | N | 14.94 |  | 27-Jan-21 | 28-Jan-21 |           |  | 29-Jan-21 |           |
| C19IMPACT_0184 | Saint Lucia            | 18-Jan-21  | CARPHA | N | N | N | N | N | N | 17.25 |  | 27-Jan-21 | 28-Jan-21 |           |  | 29-Jan-21 |           |
| C19IMPACT_0185 | Saint Lucia            | 18-Jan-21  | CARPHA | N | N | N | N | N | N | 14.33 |  | 27-Jan-21 | 28-Jan-21 |           |  | 29-Jan-21 |           |
| C19IMPACT_0186 | Saint Lucia            | 18-Jan-21  | CARPHA | N | N | N | N | N | N | 14.50 |  | 27-Jan-21 | 28-Jan-21 |           |  | 29-Jan-21 | 21-Jan-22 |
| C19IMPACT_0187 | Saint Lucia            | 18-Jan-21  | CARPHA | N | N | N | N | N | N | 16.59 |  | 27-Jan-21 | 28-Jan-21 |           |  | 29-Jan-21 | 21-Jan-22 |
| C19IMPACT_0188 | Saint Lucia            | 18-Jan-21  | CARPHA | N | N | N | N | N | N | 15.39 |  | 27-Jan-21 | 28-Jan-21 |           |  | 29-Jan-21 | 21-Jan-22 |

|                |                                  |           |        |   |   |   |   |   |   |       |       |           |           |           |           |           |
|----------------|----------------------------------|-----------|--------|---|---|---|---|---|---|-------|-------|-----------|-----------|-----------|-----------|-----------|
| C19IMPACT_0189 | Saint Lucia                      | 18-Jan-21 | CARPHA | N | N | N | N | N | N | 16.00 |       | 27-Jan-21 | 28-Jan-21 |           | 29-Jan-21 | 21-Jan-22 |
| C19IMPACT_0190 | Trinidad and Tobago              | 25-Jan-21 | MoH    | N | N | N | N | N | N |       |       | 01-Jan-20 | 28-Jan-21 | 29-Jan-21 |           | 21-Jan-22 |
| C19IMPACT_0191 | Trinidad and Tobago              | 25-Jan-21 | MoH    | N | N | N | N | N | N |       |       | 01-Jan-20 | 28-Jan-21 | 29-Jan-21 |           | 21-Jan-22 |
| C19IMPACT_0192 | Trinidad and Tobago              | 25-Jan-21 | MoH    | N | N | N | N | N | N |       |       | 01-Jan-20 | 28-Jan-21 | 29-Jan-21 |           | 21-Jan-22 |
| C19IMPACT_0193 | Trinidad and Tobago              | 25-Jan-21 | MoH    | N | N | N | N | N | N |       |       | 01-Jan-20 | 28-Jan-21 | 29-Jan-21 |           | 21-Jan-22 |
| C19IMPACT_0194 | Trinidad and Tobago              | 25-Jan-21 | MoH    | N | N | N | N | N | N |       |       | 01-Jan-20 | 28-Jan-21 | 29-Jan-21 |           | 21-Jan-22 |
| C19IMPACT_0195 | Trinidad and Tobago              | 25-Jan-21 | MoH    | N | N | N | N | N | N |       |       | 01-Jan-20 | 28-Jan-21 | 29-Jan-21 | 13-Oct-21 | 21-Jan-22 |
| C19IMPACT_0196 | Trinidad and Tobago              | 25-Jan-21 | MoH    | N | N | N | N | N | N |       |       | 01-Jan-20 | 28-Jan-21 | 29-Jan-21 |           | 21-Jan-22 |
| C19IMPACT_0197 | Trinidad and Tobago              |           | MoH    | N | N | N | N | N | N | 19.31 |       |           | 28-Jan-21 | 29-Jan-21 |           | 21-Jan-22 |
| C19IMPACT_0198 | Bermuda                          | 12-Nov-20 | CARPHA | N | N | N | N | N | Y | 16.38 |       | 03-Feb-21 | 17-Feb-21 |           | 28-Feb-21 | 04-Jun-21 |
| C19IMPACT_0199 | Bermuda                          | 30-Nov-20 | CARPHA | N | N | N | N | N | Y | 18.94 |       | 03-Feb-21 | 17-Feb-21 |           | 28-Feb-21 | 04-Jun-21 |
| C19IMPACT_0200 | Bermuda                          | 06-Dec-20 | CARPHA | N | N | N | N | N | Y | 14.36 |       | 03-Feb-21 | 17-Feb-21 |           | 28-Feb-21 | 04-Jun-21 |
| C19IMPACT_0201 | Bermuda                          | 12-Dec-20 | CARPHA | N | N | N | N | N | Y | 16.74 |       | 03-Feb-21 | 17-Feb-21 |           | 28-Feb-21 | 04-Jun-21 |
| C19IMPACT_0202 | Bermuda                          | 14-Dec-20 | CARPHA | N | N | N | N | N | Y | 16.07 |       | 03-Feb-21 | 17-Feb-21 |           | 28-Feb-21 | 04-Jun-21 |
| C19IMPACT_0203 | Bermuda                          | 19-Dec-20 | CARPHA | N | N | N | N | N | Y | 13.69 |       | 03-Feb-21 | 17-Feb-21 |           | 28-Feb-21 | 04-Jun-21 |
| C19IMPACT_0204 | Bermuda                          | 23-Dec-20 | CARPHA | N | N | N | N | N | Y | 15.45 |       | 03-Feb-21 | 17-Feb-21 |           | 28-Feb-21 | 04-Jun-21 |
| C19IMPACT_0205 | Bermuda                          | 26-Dec-20 | CARPHA | N | N | N | N | N | Y | 17.35 |       | 03-Feb-21 | 17-Feb-21 |           | 28-Feb-21 | 04-Jun-21 |
| C19IMPACT_0206 | Bermuda                          | 05-Jan-21 | CARPHA | N | N | N | N | N | Y | 16.72 |       | 03-Feb-21 | 17-Feb-21 |           | 28-Feb-21 | 04-Jun-21 |
| C19IMPACT_0207 | Bermuda                          | 12-Jan-21 | CARPHA | N | N | N | N | N | Y | 22.20 |       | 03-Feb-21 | 17-Feb-21 |           | 28-Feb-21 | 04-Jun-21 |
| C19IMPACT_0208 | British Virgin Islands           | 12-Jan-21 | CARPHA | N | N | N | N | N | Y | 15.49 |       | 05-Feb-21 | 17-Feb-21 |           | 28-Feb-21 | 04-Jun-21 |
| C19IMPACT_0209 | British Virgin Islands           | 13-Jan-21 | CARPHA | N | N | N | N | N | Y | 16.52 |       | 05-Feb-21 | 17-Feb-21 |           | 28-Feb-21 | 04-Jun-21 |
| C19IMPACT_0210 | British Virgin Islands           | 19-Jan-21 | CARPHA | N | N | N | N | N | Y | 14.79 |       | 05-Feb-21 | 17-Feb-21 |           | 28-Feb-21 | 04-Jun-21 |
| C19IMPACT_0211 | Antigua and Barbuda              | 21-Jan-21 | CARPHA | N | N | N | N | N | Y | 22.03 |       | 03-Feb-21 | 17-Feb-21 |           | 28-Feb-21 | 04-Jun-21 |
| C19IMPACT_0212 | British Virgin Islands           | 23-Jan-21 | CARPHA | N | N | N | N | N | Y | 21.18 |       | 05-Feb-21 | 17-Feb-21 |           | 28-Feb-21 | 04-Jun-21 |
| C19IMPACT_0213 | British Virgin Islands           | 25-Jan-21 | CARPHA | N | N | N | N | N | Y | 16.85 |       | 05-Feb-21 | 17-Feb-21 |           | 28-Feb-21 | 04-Jun-21 |
| C19IMPACT_0214 | Antigua and Barbuda              | 26-Jan-21 | CARPHA | N | N | N | N | N | Y | 15.85 |       | 03-Feb-21 | 17-Feb-21 |           | 28-Feb-21 | 04-Jun-21 |
| C19IMPACT_0215 | Saint Vincent and the Grenadines | 27-Jan-21 | CARPHA | N | N | N | N | N | Y | 21.58 |       | 05-Feb-21 | 17-Feb-21 |           | 28-Feb-21 | 04-Jun-21 |
| C19IMPACT_0216 | Saint Vincent and the Grenadines | 29-Jan-21 | CARPHA | N | N | N | N | N | Y | 19.35 |       | 05-Feb-21 | 17-Feb-21 |           | 28-Feb-21 | 04-Jun-21 |
| C19IMPACT_0217 | Saint Vincent and the Grenadines | 29-Jan-21 | CARPHA | N | N | N | N | N | Y | 18.24 |       | 05-Feb-21 | 17-Feb-21 |           | 28-Feb-21 | 04-Jun-21 |
| C19IMPACT_0218 | Saint Vincent and the Grenadines | 29-Jan-21 | CARPHA | N | N | N | N | N | Y | 17.60 |       | 05-Feb-21 | 17-Feb-21 |           | 28-Feb-21 | 04-Jun-21 |
| C19IMPACT_0219 | Trinidad and Tobago              | 07-Jan-21 | MoH    | N | N | N | N | N |   |       | 3.46  | 19-Jan-21 | 19-Feb-21 | 26-Feb-21 |           |           |
| C19IMPACT_0220 | Trinidad and Tobago              | 07-Jan-21 | MoH    | N | N | N | N | N |   |       | 6.42  | 19-Jan-21 | 19-Feb-21 | 26-Feb-21 |           |           |
| C19IMPACT_0221 | Trinidad and Tobago              | 13-Jan-21 | MoH    | N | N | N | N | N |   |       | 11.38 | 19-Jan-21 | 19-Feb-21 | 26-Feb-21 |           |           |
| C19IMPACT_0222 | Trinidad and Tobago              | 15-Jan-21 | MoH    | N | N | N | N | N |   |       | 5.00  | 19-Jan-21 | 19-Feb-21 | 26-Feb-21 |           |           |
| C19IMPACT_0223 | Trinidad and Tobago              | 17-Jan-21 | MoH    | N | N | N | N | N |   |       | 14.00 | 19-Jan-21 | 19-Feb-21 | 26-Feb-21 |           |           |
| C19IMPACT_0224 | Trinidad and Tobago              | 20-Jan-21 | MoH    | N | N | N | N | N |   |       | 11.38 | 19-Jan-21 | 19-Feb-21 | 26-Feb-21 |           |           |
| C19IMPACT_0225 | Turks and Caicos Islands         | 21-Jan-21 | CARPHA | N | N | N | N | N |   | 19.09 |       | 19-Jan-21 | 19-Feb-21 |           | 25-Feb-21 | 21-Jan-22 |
| C19IMPACT_0226 | Turks and Caicos Islands         | 21-Jan-21 | CARPHA | N | N | N | N | N |   | 16.48 |       | 19-Jan-21 | 19-Feb-21 |           | 25-Feb-21 | 21-Jan-22 |
| C19IMPACT_0227 | Turks and Caicos Islands         | 21-Jan-21 | CARPHA | N | N | N | N | N |   | 21.59 |       | 19-Jan-21 | 19-Feb-21 |           | 25-Feb-21 |           |
| C19IMPACT_0228 | Turks and Caicos Islands         | 22-Jan-21 | CARPHA | N | N | N | N | N |   | 19.44 |       | 19-Jan-21 | 19-Feb-21 |           | 25-Feb-21 |           |
| C19IMPACT_0229 | Trinidad and Tobago              | 29-Jan-21 | MoH    | N | N | N | N | N |   |       |       | 19-Jan-21 | 19-Feb-21 | 26-Feb-21 |           |           |
| C19IMPACT_0230 | Trinidad and Tobago              | 05-Feb-21 | CARPHA | N | N | N | N | Y |   |       | 4.48  | 18-Feb-21 | 19-Feb-21 | 05-Mar-21 | 25-Feb-21 | 21-Jan-22 |
| C19IMPACT_0231 | Trinidad and Tobago              |           | CARPHA | N | N | N | N | Y |   |       |       | 18-Feb-21 | 19-Feb-21 | 05-Mar-21 | 25-Feb-21 |           |
| C19IMPACT_0232 | Trinidad and Tobago              |           | CARPHA | N | N | N | N | Y |   |       |       | 18-Feb-21 | 19-Feb-21 | 05-Mar-21 | 25-Feb-21 |           |
| C19IMPACT_0233 | Trinidad and Tobago              |           | CARPHA | N | N | N | N | Y |   |       |       | 18-Feb-21 | 19-Feb-21 | 05-Mar-21 | 25-Feb-21 |           |
| C19IMPACT_0234 | Trinidad and Tobago              |           | CARPHA | N | N | N | N | Y |   |       |       | 18-Feb-21 | 19-Feb-21 | 05-Mar-21 | 25-Feb-21 |           |
| C19IMPACT_0235 | Trinidad and Tobago              |           | CARPHA | N | N | N | N | Y |   |       |       | 18-Feb-21 | 19-Feb-21 | 05-Mar-21 | 25-Feb-21 |           |
| C19IMPACT_0236 | Trinidad and Tobago              | 02-Mar-21 | MoH    | N | N | N | N | Y |   |       |       | 12-Feb-21 | 25-Feb-21 | 05-Mar-21 |           | 21-Jan-22 |
| C19IMPACT_0237 | Trinidad and Tobago              | 07-May-21 | MoH    | N | N | N | N | Y |   |       |       | 18-Feb-21 | 25-Feb-21 | 05-Mar-21 |           | 21-Jan-22 |
| C19IMPACT_0238 | Trinidad and Tobago              | 29-Jun-21 | MoH    | N | N | N | N | Y |   |       |       | 18-Feb-21 | 25-Feb-21 | 05-Mar-21 | 02-Mar-21 |           |
| C19IMPACT_0239 | Trinidad and Tobago              |           | MoH    | N | N | N | N | Y |   |       |       | 18-Feb-21 | 25-Feb-21 | 05-Mar-21 |           |           |
| C19IMPACT_0240 | Trinidad and Tobago              |           | MoH    | N | N | N | N | Y |   |       |       | 18-Feb-21 | 25-Feb-21 | 05-Mar-21 |           |           |
| C19IMPACT_0241 | Trinidad and Tobago              |           | MoH    | N | N | N | N | Y |   |       |       | 18-Feb-21 | 25-Feb-21 | 05-Mar-21 |           |           |
| C19IMPACT_0242 | Trinidad and Tobago              |           | MoH    | N | N | N | N | Y |   |       |       | 18-Feb-21 | 25-Feb-21 | 05-Mar-21 |           |           |
| C19IMPACT_0243 | Trinidad and Tobago              |           | MoH    | N | N | N | N | Y |   |       |       | 18-Feb-21 | 25-Feb-21 | 05-Mar-21 |           |           |
| C19IMPACT_0244 | Trinidad and Tobago              |           | MoH    | N | N | N | N | Y |   |       |       | 18-Feb-21 | 25-Feb-21 | 05-Mar-21 |           |           |
| C19IMPACT_0245 | Trinidad and Tobago              |           | MoH    | N | N | N | N | Y |   |       |       | 18-Feb-21 | 25-Feb-21 | 05-Mar-21 |           |           |
| C19IMPACT_0246 | Trinidad and Tobago              |           | MoH    | N | N | N | N | Y |   |       |       | 18-Feb-21 | 25-Feb-21 | 05-Mar-21 |           |           |
| C19IMPACT_0247 | Trinidad and Tobago              |           | MoH    | N | N | N | N | Y |   |       |       | 18-Feb-21 | 25-Feb-21 | 05-Mar-21 |           |           |
| C19IMPACT_0248 | Trinidad and Tobago              |           | MoH    | N | N | N | N | Y |   |       |       | 18-Feb-21 | 25-Feb-21 | 05-Mar-21 |           |           |
| C19IMPACT_0249 | Trinidad and Tobago              |           | MoH    | N | N | N | N | Y |   |       |       | 18-Feb-21 | 25-Feb-21 | 05-Mar-21 |           |           |
| C19IMPACT_0250 | Trinidad and Tobago              |           | MoH    | N | N | N | N | Y |   |       |       | 18-Feb-21 | 25-Feb-21 | 05-Mar-21 |           |           |
| C19IMPACT_0251 | Trinidad and Tobago              |           | MoH    | N | N | N | N | Y |   |       |       | 18-Feb-21 | 25-Feb-21 | 05-Mar-21 |           |           |
| C19IMPACT_0252 | Trinidad and Tobago              |           | MoH    | N | N | N | N | Y |   |       |       | 18-Feb-21 | 25-Feb-21 | 05-Mar-21 |           |           |

|                |                                  |           |        |   |   |   |   |   |   |       |       |           |           |           |           |           |
|----------------|----------------------------------|-----------|--------|---|---|---|---|---|---|-------|-------|-----------|-----------|-----------|-----------|-----------|
| C19IMPACT_0253 | Trinidad and Tobago              |           | MoH    | N | N | N | N | N | Y |       |       | 18-Feb-21 | 25-Feb-21 | 05-Mar-21 |           |           |
| C19IMPACT_0254 | Trinidad and Tobago              |           | MoH    | N | N | N | N | N | Y |       |       | 18-Feb-21 | 25-Feb-21 | 05-Mar-21 |           |           |
| C19IMPACT_0255 | Trinidad and Tobago              |           | MoH    | N | N | N | N | N | Y |       |       | 18-Feb-21 | 25-Feb-21 | 05-Mar-21 |           |           |
| C19IMPACT_0256 | Trinidad and Tobago              |           | MoH    | N | N | N | N | N | Y |       |       | 18-Feb-21 | 25-Feb-21 | 05-Mar-21 |           |           |
| C19IMPACT_0257 | Trinidad and Tobago              |           | MoH    | N | N | N | N | N | Y |       |       | 18-Feb-21 | 25-Feb-21 | 05-Mar-21 |           |           |
| C19IMPACT_0258 | Dominica                         | 16-Dec-20 | CARPHA | N | N | N | N | N | Y | 25.52 |       | 01-Mar-21 | 03-Mar-21 |           | 05-Mar-21 | 23-Jun-21 |
| C19IMPACT_0259 | Dominica                         | 02-Jan-21 | CARPHA | N | N | N | N | N | Y | 24.32 |       | 01-Mar-21 | 03-Mar-21 |           | 05-Mar-21 | 23-Jun-21 |
| C19IMPACT_0260 | Dominica                         | 02-Jan-21 | CARPHA | N | N | N | N | N | Y | 22.82 |       | 01-Mar-21 | 03-Mar-21 |           | 05-Mar-21 | 23-Jun-21 |
| C19IMPACT_0261 | Jamaica                          | 21-Jan-21 | CARPHA | N | N | N | N | N | Y | 16.39 |       | 01-Mar-21 | 03-Mar-21 |           | 05-Mar-21 | 23-Jun-21 |
| C19IMPACT_0262 | Jamaica                          | 21-Jan-21 | CARPHA | N | N | N | N | N | Y | 13.95 |       | 01-Mar-21 | 03-Mar-21 |           | 05-Mar-21 | 23-Jun-21 |
| C19IMPACT_0263 | Jamaica                          | 21-Jan-21 | CARPHA | N | N | N | N | N | Y | 23.14 |       | 01-Mar-21 | 03-Mar-21 |           | 05-Mar-21 | 23-Jun-21 |
| C19IMPACT_0264 | Dominica                         | 22-Jan-21 | CARPHA | N | N | N | N | N | Y | 22.84 |       | 01-Mar-21 | 03-Mar-21 |           | 05-Mar-21 | 23-Jun-21 |
| C19IMPACT_0265 | Dominica                         | 22-Jan-21 | CARPHA | N | N | N | N | N | Y | 17.81 |       | 01-Mar-21 | 03-Mar-21 |           | 05-Mar-21 | 23-Jun-21 |
| C19IMPACT_0266 | Jamaica                          | 23-Jan-21 | CARPHA | N | N | N | N | N | Y | 21.47 |       | 01-Mar-21 | 03-Mar-21 |           | 05-Mar-21 | 23-Jun-21 |
| C19IMPACT_0267 | Jamaica                          | 23-Jan-21 | CARPHA | N | N | N | N | N | Y | 14.97 |       | 01-Mar-21 | 03-Mar-21 |           | 05-Mar-21 | 23-Jun-21 |
| C19IMPACT_0268 | Jamaica                          | 24-Jan-21 | CARPHA | N | N | N | N | N | Y | 17.87 |       | 01-Mar-21 | 03-Mar-21 |           | 05-Mar-21 | 23-Jun-21 |
| C19IMPACT_0269 | Jamaica                          | 27-Jan-21 | CARPHA | N | N | N | N | N | Y | 24.23 |       | 01-Mar-21 | 03-Mar-21 |           | 05-Mar-21 | 23-Jun-21 |
| C19IMPACT_0270 | Jamaica                          | 28-Jan-21 | CARPHA | N | N | N | N | N | Y | 19.11 |       | 01-Mar-21 | 03-Mar-21 |           | 05-Mar-21 | 23-Jun-21 |
| C19IMPACT_0271 | Saint Vincent and the Grenadines | 28-Jan-21 | CARPHA | N | N | N | N | N | Y | 13.45 |       | 01-Mar-21 | 03-Mar-21 |           | 05-Mar-21 | 23-Jun-21 |
| C19IMPACT_0272 | Dominica                         | 29-Jan-21 | CARPHA | N | N | N | N | N | Y | 19.50 |       | 01-Mar-21 | 03-Mar-21 |           | 05-Mar-21 | 23-Jun-21 |
| C19IMPACT_0273 | Saint Vincent and the Grenadines | 29-Jan-21 | CARPHA | N | N | N | N | N | Y | 17.82 |       | 01-Mar-21 | 03-Mar-21 |           | 05-Mar-21 | 23-Jun-21 |
| C19IMPACT_0274 | Saint Vincent and the Grenadines | 30-Jan-21 | CARPHA | N | N | N | N | N | Y | 18.57 |       | 01-Mar-21 | 03-Mar-21 |           | 05-Mar-21 | 23-Jun-21 |
| C19IMPACT_0275 | Trinidad and Tobago              | 17-Feb-21 | MoH    | N | N | N | N | N | Y | 25.00 |       | 24-Feb-21 | 03-Mar-21 | 05-Mar-21 |           | 23-Jun-21 |
| C19IMPACT_0276 | Trinidad and Tobago              | 19-Feb-21 | MoH    | N | Y | N | N | N | Y | 18.70 |       | 24-Feb-21 | 03-Mar-21 | 05-Mar-21 |           | 23-Jun-21 |
| C19IMPACT_0277 | Trinidad and Tobago              | 19-Feb-21 | MoH    | N | N | N | N | N | Y |       |       | 03-Mar-21 |           | 05-Mar-21 |           | 21-Jan-22 |
| C19IMPACT_0278 | Trinidad and Tobago              | 19-Feb-21 | MoH    | N | N | N | N | N | Y |       |       | 03-Mar-21 |           | 05-Mar-21 |           | 21-Jan-22 |
| C19IMPACT_0279 | Trinidad and Tobago              | 08-Mar-21 | MoH    | N | N | N | N | N | Y | 7.18  |       | 24-Feb-21 | 03-Mar-21 | 05-Mar-21 |           | 21-Jan-22 |
| C19IMPACT_0280 | Trinidad and Tobago              | 08-Mar-21 | MoH    | N | N | N | N | N | Y |       |       | 16-Mar-21 | 18-Mar-21 | 19-Mar-21 |           | 21-Jan-22 |
| C19IMPACT_0281 | Montserrat                       | 09-Mar-21 | CARPHA | N | N | N | N | N | N | 20.33 | 6.49  | 16-Mar-21 | 18-Mar-21 |           | 19-Mar-21 |           |
| C19IMPACT_0282 | Trinidad and Tobago              | 17-Mar-21 | MoH    | N | N | N | N | N | N |       | 9.02  | 16-Mar-21 | 18-Mar-21 | 19-Mar-21 |           |           |
| C19IMPACT_0283 | Trinidad and Tobago              | 17-Mar-21 | CARPHA | N | N | N | N | N | Y | 17.28 |       | 16-Mar-21 | 18-Mar-21 | 19-Mar-21 |           | 19-Mar-21 |
| C19IMPACT_0284 | Grenada                          | 12-Mar-21 | CARPHA | N | N | N | N | N | Y | 19.47 |       | 18-Mar-21 | 25-Mar-21 |           | 26-Mar-21 | 14-Jun-21 |
| C19IMPACT_0285 | Barbados                         | 16-Mar-21 | CARPHA | N | N | N | N | N | Y | 17.18 |       | 23-Mar-21 | 25-Mar-21 |           | 26-Mar-21 | 14-Jun-21 |
| C19IMPACT_0286 | Barbados                         | 16-Mar-21 | CARPHA | N | N | N | N | N | Y | 19.86 |       | 23-Mar-21 | 25-Mar-21 |           | 26-Mar-21 | 14-Jun-21 |
| C19IMPACT_0287 | Barbados                         | 16-Mar-21 | CARPHA | N | N | N | N | N | Y | 23.60 |       | 23-Mar-21 | 25-Mar-21 |           | 26-Mar-21 | 14-Jun-21 |
| C19IMPACT_0288 | Barbados                         | 16-Mar-21 | CARPHA | N | N | N | N | N | Y | 18.91 |       | 23-Mar-21 | 25-Mar-21 |           | 26-Mar-21 | 14-Jun-21 |
| C19IMPACT_0289 | Barbados                         | 16-Mar-21 | CARPHA | N | N | N | N | N | Y | 17.34 |       | 23-Mar-21 | 25-Mar-21 |           | 26-Mar-21 | 14-Jun-21 |
| C19IMPACT_0290 | Trinidad and Tobago              | 18-Mar-21 | CARPHA | N | N | N | N | N | Y | 16.68 |       | 23-Mar-21 | 25-Mar-21 | 26-Mar-21 | 26-Mar-21 |           |
| C19IMPACT_0291 | Trinidad and Tobago              | 18-Mar-21 | CARPHA | N | N | N | N | N | Y | 22.86 |       | 23-Mar-21 | 25-Mar-21 | 26-Mar-21 | 26-Mar-21 |           |
| C19IMPACT_0292 | Trinidad and Tobago              | 19-Mar-21 | CARPHA | N | N | N | N | Y | Y | 18.88 |       | 23-Mar-21 | 25-Mar-21 | 26-Mar-21 | 26-Mar-21 |           |
| C19IMPACT_0293 | Barbados                         | 31-Mar-21 | CARPHA | N | N | N | N | N | Y | 22.68 |       | 23-Mar-21 | 25-Mar-21 |           | 26-Mar-21 | 14-Jun-21 |
| C19IMPACT_0294 | Barbados                         | 26-Apr-21 | CARPHA | N | N | N | N | N | Y | 17.89 |       | 23-Mar-21 | 25-Mar-21 |           | 26-Mar-21 | 14-Jun-21 |
| C19IMPACT_0295 | Saint Lucia                      | 07-Feb-21 | CARPHA | N | N | N | N | N | Y | 17.84 |       | 24-Mar-21 | 27-Mar-21 |           | 29-Mar-21 | 04-Jun-21 |
| C19IMPACT_0296 | Saint Lucia                      | 24-Feb-21 | CARPHA | N | N | N | N | N | Y | 21.40 |       | 24-Mar-21 | 27-Mar-21 |           | 29-Mar-21 | 04-Jun-21 |
| C19IMPACT_0297 | Saint Lucia                      | 12-Mar-21 | CARPHA | N | N | N | N | N | Y | 23.97 |       | 24-Mar-21 | 27-Mar-21 |           | 29-Mar-21 | 04-Jun-21 |
| C19IMPACT_0298 | Saint Lucia                      | 13-Mar-21 | CARPHA | N | N | N | N | N | Y | 17.96 |       | 24-Mar-21 | 27-Mar-21 |           | 29-Mar-21 | 04-Jun-21 |
| C19IMPACT_0299 | Saint Lucia                      | 14-Mar-21 | CARPHA | N | N | N | N | N | Y | 21.38 |       | 24-Mar-21 | 27-Mar-21 |           | 29-Mar-21 | 04-Jun-21 |
| C19IMPACT_0300 | Saint Lucia                      | 15-Mar-21 | CARPHA | N | N | N | N | N | Y | 20.13 |       | 24-Mar-21 | 27-Mar-21 |           | 29-Mar-21 | 04-Jun-21 |
| C19IMPACT_0301 | Saint Lucia                      | 16-Mar-21 | CARPHA | N | N | N | N | N | Y | 19.00 |       | 24-Mar-21 | 27-Mar-21 |           | 29-Mar-21 | 04-Jun-21 |
| C19IMPACT_0302 | Anguilla                         | 18-Mar-21 | CARPHA | N | N | N | N | N | Y | 19.01 |       | 25-Mar-21 | 27-Mar-21 |           | 29-Mar-21 | 04-Jun-21 |
| C19IMPACT_0303 | Trinidad and Tobago              | 18-Mar-21 | MoH    | N | N | N | N | Y | Y | 18.00 |       | 25-Mar-21 | 27-Mar-21 | 02-Apr-21 |           |           |
| C19IMPACT_0304 | Anguilla                         | 19-Mar-21 | CARPHA | N | N | N | N | N | Y | 23.17 |       | 25-Mar-21 | 27-Mar-21 |           | 29-Mar-21 | 04-Jun-21 |
| C19IMPACT_0305 | Anguilla                         | 23-Mar-21 | CARPHA | N | N | N | N | N | Y | 15.72 |       | 25-Mar-21 | 27-Mar-21 |           | 29-Mar-21 | 04-Jun-21 |
| C19IMPACT_0306 | Trinidad and Tobago              | 24-Mar-21 | MoH    | N | N | N | N | N | Y | 18.00 |       | 25-Mar-21 | 27-Mar-21 | 02-Apr-21 |           |           |
| C19IMPACT_0307 | Trinidad and Tobago              | 09-Mar-21 | CARPHA | N | N | N | N | N | Y | 23.82 |       | 01-Apr-21 | 01-Apr-21 | 02-Apr-21 | 02-Apr-21 | 21-Jan-22 |
| C19IMPACT_0308 | Trinidad and Tobago              | 17-Mar-21 | CARPHA | N | N | N | N | N | Y | 17.01 |       | 01-Apr-21 | 01-Apr-21 | 02-Apr-21 | 02-Apr-21 | 21-Jan-22 |
| C19IMPACT_0309 | Trinidad and Tobago              | 17-Mar-21 | CARPHA | N | N | N | N | N | Y | 16.94 |       | 01-Apr-21 | 01-Apr-21 | 02-Apr-21 | 02-Apr-21 | 21-Jan-22 |
| C19IMPACT_0310 | Trinidad and Tobago              | 17-Mar-21 | CARPHA | N | N | N | N | N | Y | 17.12 |       | 01-Apr-21 | 01-Apr-21 | 02-Apr-21 | 02-Apr-21 | 21-Jan-22 |
| C19IMPACT_0311 | Trinidad and Tobago              | 21-Mar-21 | MoH    | N | N | N | N | N | Y |       | 7.82  | 29-Mar-21 | 01-Apr-21 | 02-Apr-21 |           |           |
| C19IMPACT_0312 | Trinidad and Tobago              | 22-Mar-21 | MoH    | N | N | N | N | N | Y |       | 13.42 | 29-Mar-21 | 01-Apr-21 | 02-Apr-21 |           |           |
| C19IMPACT_0313 | Trinidad and Tobago              | 23-Mar-21 | CARPHA | N | N | N | N | Y | Y | 14.71 |       | 01-Apr-21 | 01-Apr-21 | 02-Apr-21 | 02-Apr-21 |           |
| C19IMPACT_0314 | Trinidad and Tobago              | 23-Mar-21 | CARPHA | N | N | N | N | Y | Y | 21.18 |       | 01-Apr-21 | 01-Apr-21 | 02-Apr-21 | 02-Apr-21 |           |
| C19IMPACT_0315 | Trinidad and Tobago              | 23-Mar-21 | CARPHA | N | N | N | N | Y | Y | 15.30 |       | 01-Apr-21 | 01-Apr-21 | 02-Apr-21 | 02-Apr-21 |           |
| C19IMPACT_0316 | Trinidad and Tobago              | 23-Mar-21 | CARPHA | N | N | N | N | Y | Y | 16.09 |       | 01-Apr-21 | 01-Apr-21 | 02-Apr-21 | 02-Apr-21 |           |





|                |                     |           |        |   |   |   |   |   |   |       |           |           |           |           |           |
|----------------|---------------------|-----------|--------|---|---|---|---|---|---|-------|-----------|-----------|-----------|-----------|-----------|
| C19IMPACT_0445 | Trinidad and Tobago | 19-Apr-21 | CARPHA | N | N | N | N | Y | N | 20.13 | 23-Apr-21 | 24-Apr-21 | 30-Apr-21 | 27-Apr-21 | 24-Apr-21 |
| C19IMPACT_0446 | Trinidad and Tobago | 19-Apr-21 | CARPHA | N | N | N | N | N | N | 19.34 | 23-Apr-21 | 24-Apr-21 | 30-Apr-21 | 27-Apr-21 | 24-Apr-21 |
| C19IMPACT_0447 | Trinidad and Tobago | 20-Apr-21 | CARPHA | N | N | Y | N | N | N | 22.25 | 23-Apr-21 | 24-Apr-21 | 30-Apr-21 | 27-Apr-21 |           |
| C19IMPACT_0448 | Trinidad and Tobago | 20-Apr-21 | CARPHA | N | N | N | N | Y | N | 19.73 | 23-Apr-21 | 24-Apr-21 | 30-Apr-21 | 27-Apr-21 | 24-Apr-21 |
| C19IMPACT_0449 | Trinidad and Tobago | 20-Apr-21 | CARPHA | N | N | N | N | N | N | 20.97 | 23-Apr-21 | 24-Apr-21 | 30-Apr-21 | 27-Apr-21 | 24-Apr-21 |
| C19IMPACT_0450 | Trinidad and Tobago | 20-Apr-21 | CARPHA | N | N | N | N | N | N | 21.47 | 23-Apr-21 | 24-Apr-21 | 30-Apr-21 | 27-Apr-21 | 24-Apr-21 |
| C19IMPACT_0451 | Trinidad and Tobago | 20-Apr-21 | CARPHA | N | N | Y | N | N | N | 22.77 | 23-Apr-21 | 24-Apr-21 | 30-Apr-21 | 27-Apr-21 | 24-Apr-21 |
| C19IMPACT_0452 | Trinidad and Tobago | 20-Apr-21 | CARPHA | N | N | N | N | N | N | 24.16 | 23-Apr-21 | 24-Apr-21 | 30-Apr-21 | 27-Apr-21 | 24-Apr-21 |
| C19IMPACT_0453 | Trinidad and Tobago | 20-Apr-21 | CARPHA | N | N | N | N | N | N | 19.21 | 23-Apr-21 | 24-Apr-21 | 30-Apr-21 | 27-Apr-21 | 24-Apr-21 |
| C19IMPACT_0454 | Trinidad and Tobago | 20-Apr-21 | CARPHA | N | N | N | N | N | N | 18.12 | 23-Apr-21 | 24-Apr-21 | 30-Apr-21 | 27-Apr-21 | 24-Apr-21 |
| C19IMPACT_0455 | Trinidad and Tobago | 20-Apr-21 | CARPHA | N | N | N | N | N | N | 16.47 | 23-Apr-21 | 24-Apr-21 | 30-Apr-21 | 27-Apr-21 | 24-Apr-21 |
| C19IMPACT_0456 | Barbados            | 08-Apr-21 | CARPHA | N | N | N | N | N | N | 19.75 | 23-Apr-21 | 26-Apr-21 | 30-Apr-21 | 28-Apr-21 | 15-Jun-21 |
| C19IMPACT_0457 | Grenada             | 08-Apr-21 | CARPHA | N | N | N | N | N | N | 17.15 | 23-Apr-21 | 26-Apr-21 | 30-Apr-21 | 28-Apr-21 | 15-Jun-21 |
| C19IMPACT_0458 | Barbados            | 10-Apr-21 | CARPHA | N | N | N | N | N | N | 19.51 | 23-Apr-21 | 26-Apr-21 | 30-Apr-21 | 28-Apr-21 | 15-Jun-21 |
| C19IMPACT_0459 | Barbados            | 10-Apr-21 | CARPHA | N | N | N | N | N | N | 22.43 | 23-Apr-21 | 26-Apr-21 | 30-Apr-21 | 28-Apr-21 | 15-Jun-21 |
| C19IMPACT_0460 | Barbados            | 10-Apr-21 | CARPHA | N | N | N | N | N | N | 24.10 | 23-Apr-21 | 26-Apr-21 | 30-Apr-21 | 28-Apr-21 |           |
| C19IMPACT_0461 | Barbados            | 10-Apr-21 | CARPHA | N | N | N | N | N | N | 15.45 | 23-Apr-21 | 26-Apr-21 | 30-Apr-21 | 28-Apr-21 | 15-Jun-21 |
| C19IMPACT_0462 | Barbados            | 10-Apr-21 | CARPHA | N | N | N | N | N | N | 19.95 | 23-Apr-21 | 26-Apr-21 | 30-Apr-21 | 28-Apr-21 | 15-Jun-21 |
| C19IMPACT_0463 | Barbados            | 12-Apr-21 | CARPHA | N | N | N | N | N | N | 21.68 | 23-Apr-21 | 26-Apr-21 | 30-Apr-21 | 28-Apr-21 | 15-Jun-21 |
| C19IMPACT_0464 | Barbados            | 12-Apr-21 | CARPHA | N | N | N | N | N | N | 21.47 | 23-Apr-21 | 26-Apr-21 | 30-Apr-21 | 28-Apr-21 | 15-Jun-21 |
| C19IMPACT_0465 | Grenada             | 12-Apr-21 | CARPHA | N | N | N | N | N | N | 22.59 | 23-Apr-21 | 26-Apr-21 | 30-Apr-21 | 28-Apr-21 | 15-Jun-21 |
| C19IMPACT_0466 | Barbados            | 14-Apr-21 | CARPHA | N | N | N | N | N | N | 19.29 | 23-Apr-21 | 26-Apr-21 | 30-Apr-21 | 28-Apr-21 |           |
| C19IMPACT_0467 | Trinidad and Tobago | 19-Apr-21 | CARPHA | N | N | N | N | N | N | 22.22 | 23-Apr-21 | 26-Apr-21 | 30-Apr-21 | 28-Apr-21 | 15-Jun-21 |
| C19IMPACT_0468 | Trinidad and Tobago | 19-Apr-21 | CARPHA | N | N | N | N | N | N | 19.12 | 23-Apr-21 | 26-Apr-21 | 30-Apr-21 | 28-Apr-21 | 15-Jun-21 |
| C19IMPACT_0469 | Trinidad and Tobago | 19-Apr-21 | CARPHA | N | N | N | N | N | N | 23.48 | 23-Apr-21 | 26-Apr-21 | 30-Apr-21 | 28-Apr-21 | 15-Jun-21 |
| C19IMPACT_0470 | Trinidad and Tobago | 20-Apr-21 | CARPHA | N | N | N | N | N | N | 17.27 | 23-Apr-21 | 26-Apr-21 | 30-Apr-21 | 28-Apr-21 | 15-Jun-21 |
| C19IMPACT_0471 | Trinidad and Tobago | 20-Apr-21 | CARPHA | N | N | N | N | N | N | 16.45 | 23-Apr-21 | 26-Apr-21 | 30-Apr-21 | 28-Apr-21 |           |
| C19IMPACT_0472 | Trinidad and Tobago | 20-Apr-21 | CARPHA | N | N | N | N | N | N | 17.10 | 23-Apr-21 | 26-Apr-21 | 30-Apr-21 | 28-Apr-21 | 15-Jun-21 |
| C19IMPACT_0473 | Trinidad and Tobago | 20-Apr-21 | CARPHA | Y | N | Y | N | N | N | 18.05 | 23-Apr-21 | 26-Apr-21 | 30-Apr-21 | 28-Apr-21 | 15-Jun-21 |
| C19IMPACT_0474 | Trinidad and Tobago | 26-Apr-21 | CARPHA | N | N | N | N | N | N | 16.45 | 29-Apr-21 | 27-Apr-21 |           |           |           |
| C19IMPACT_0475 | Anguilla            | 20-Apr-21 | CARPHA | N | N | N | N | N | N | 20.76 | 27-Apr-21 | 28-Apr-21 |           | 30-Apr-21 | 03-Jun-21 |
| C19IMPACT_0476 | Trinidad and Tobago | 20-Apr-21 | CARPHA | N | N | N | N | Y | N | 20.04 | 27-Apr-21 | 28-Apr-21 | 30-Apr-21 | 30-Apr-21 | 03-Jun-21 |
| C19IMPACT_0477 | Anguilla            | 21-Apr-21 | CARPHA | N | N | N | N | N | N | 22.21 | 27-Apr-21 | 28-Apr-21 | 30-Apr-21 | 30-Apr-21 | 03-Jun-21 |
| C19IMPACT_0478 | Anguilla            | 21-Apr-21 | CARPHA | N | N | N | N | N | N | 24.81 | 27-Apr-21 | 28-Apr-21 | 30-Apr-21 | 30-Apr-21 |           |
| C19IMPACT_0479 | Anguilla            | 21-Apr-21 | CARPHA | N | N | N | N | N | N | 20.57 | 27-Apr-21 | 28-Apr-21 | 30-Apr-21 | 30-Apr-21 | 03-Jun-21 |
| C19IMPACT_0480 | Anguilla            | 21-Apr-21 | CARPHA | N | N | N | N | N | Y | 21.09 | 27-Apr-21 | 28-Apr-21 |           | 06-Dec-22 |           |
| C19IMPACT_0481 | Trinidad and Tobago | 21-Apr-21 | CARPHA | N | N | N | N | N | N | 23.08 | 27-Apr-21 | 28-Apr-21 | 30-Apr-21 | 30-Apr-21 |           |
| C19IMPACT_0482 | Trinidad and Tobago | 21-Apr-21 | CARPHA | N | N | N | N | N | N | 21.97 | 27-Apr-21 | 28-Apr-21 | 30-Apr-21 | 30-Apr-21 | 03-Jun-21 |
| C19IMPACT_0483 | Anguilla            | 22-Apr-21 | CARPHA | N | N | N | N | N | N | 20.49 | 27-Apr-21 | 28-Apr-21 | 30-Apr-21 | 30-Apr-21 | 03-Jun-21 |
| C19IMPACT_0484 | Anguilla            | 22-Apr-21 | CARPHA | N | N | N | N | N | N | 19.53 | 27-Apr-21 | 28-Apr-21 | 30-Apr-21 | 30-Apr-21 | 03-Jun-21 |
| C19IMPACT_0485 | Anguilla            | 22-Apr-21 | CARPHA | N | N | N | N | N | N | 20.29 | 27-Apr-21 | 28-Apr-21 | 30-Apr-21 | 30-Apr-21 | 03-Jun-21 |
| C19IMPACT_0486 | Anguilla            | 22-Apr-21 | CARPHA | N | N | N | N | N | N | 20.91 | 27-Apr-21 | 28-Apr-21 | 30-Apr-21 | 30-Apr-21 | 03-Jun-21 |
| C19IMPACT_0487 | Anguilla            | 22-Apr-21 | CARPHA | N | N | N | N | N | Y | 23.41 | 27-Apr-21 | 28-Apr-21 |           | 06-Dec-22 |           |
| C19IMPACT_0488 | Trinidad and Tobago | 22-Apr-21 | CARPHA | N | N | N | N | Y | N | 16.01 | 27-Apr-21 | 28-Apr-21 | 30-Apr-21 | 30-Apr-21 | 03-Jun-21 |
| C19IMPACT_0489 | Trinidad and Tobago | 22-Apr-21 | CARPHA | N | N | N | N | N | N | 17.00 | 27-Apr-21 | 28-Apr-21 | 30-Apr-21 | 30-Apr-21 | 03-Jun-21 |
| C19IMPACT_0490 | Trinidad and Tobago | 22-Apr-21 | CARPHA | N | N | N | N | N | N | 22.71 | 27-Apr-21 | 28-Apr-21 | 30-Apr-21 | 30-Apr-21 | 03-Jun-21 |
| C19IMPACT_0491 | Trinidad and Tobago | 22-Apr-21 | CARPHA | N | N | N | N | N | N | 17.93 | 27-Apr-21 | 28-Apr-21 | 30-Apr-21 | 30-Apr-21 | 03-Jun-21 |
| C19IMPACT_0492 | Trinidad and Tobago | 22-Apr-21 | CARPHA | N | N | N | N | Y | N | 22.94 | 27-Apr-21 | 28-Apr-21 | 30-Apr-21 | 30-Apr-21 | 03-Jun-21 |
| C19IMPACT_0493 | Trinidad and Tobago | 22-Apr-21 | CARPHA | N | N | N | N | Y | N | 21.28 | 27-Apr-21 | 28-Apr-21 | 30-Apr-21 | 30-Apr-21 | 03-Jun-21 |
| C19IMPACT_0494 | Trinidad and Tobago | 23-Apr-21 | CARPHA | N | N | N | N | N | N | 23.96 | 27-Apr-21 | 28-Apr-21 | 30-Apr-21 | 30-Apr-21 |           |
| C19IMPACT_0495 | Trinidad and Tobago | 23-Apr-21 | CARPHA | N | N | N | N | N | N | 23.25 | 27-Apr-21 | 28-Apr-21 | 30-Apr-21 | 30-Apr-21 |           |
| C19IMPACT_0496 | Trinidad and Tobago | 26-Apr-21 | MoH    | N | N | N | N | N | N |       | 27-Apr-21 | 28-Apr-21 | 30-Apr-21 |           | 21-Jan-22 |
| C19IMPACT_0497 | Trinidad and Tobago | 08-Apr-21 | MoH    | Y | N | Y | N | N | Y | 8.07  | 26-Apr-21 | 29-Apr-21 | 11-Jun-21 |           | 02-Jun-21 |
| C19IMPACT_0498 | Trinidad and Tobago | 14-Apr-21 | MoH    | N | N | N | N | N | Y | 8.15  | 22-Apr-21 | 29-Apr-21 | 13-Oct-21 | 01-May-21 | 02-Jun-21 |
| C19IMPACT_0499 | Trinidad and Tobago | 19-Apr-21 | CARPHA | N | N | N | N | Y | N | 19.96 | 26-Apr-21 | 29-Apr-21 | 11-Jun-21 | 01-May-21 | 02-Jun-21 |
| C19IMPACT_0500 | Trinidad and Tobago | 19-Apr-21 | CARPHA | N | N | N | N | N | N | 23.63 | 26-Apr-21 | 29-Apr-21 | 13-Oct-21 | 01-May-21 | 02-Jun-21 |
| C19IMPACT_0501 | Trinidad and Tobago | 20-Apr-21 | CARPHA | N | N | N | N | N | N | 23.25 | 26-Apr-21 | 29-Apr-21 | 27-Aug-21 | 01-May-21 | 02-Jun-21 |
| C19IMPACT_0502 | Trinidad and Tobago | 20-Apr-21 | CARPHA | N | N | N | N | N | N | 16.80 | 27-Apr-21 | 29-Apr-21 | 11-Jun-21 | 01-May-21 | 02-Jun-21 |
| C19IMPACT_0503 | Trinidad and Tobago | 20-Apr-21 | CARPHA | N | N | N | N | N | N | 15.92 | 26-Apr-21 | 29-Apr-21 | 13-Oct-21 | 01-May-21 | 02-Jun-21 |
| C19IMPACT_0504 | Trinidad and Tobago | 21-Apr-21 | CARPHA | N | N | N | N | Y | N | 16.33 | 27-Apr-21 | 29-Apr-21 | 11-Jun-21 | 01-May-21 | 02-Jun-21 |
| C19IMPACT_0505 | Trinidad and Tobago | 21-Apr-21 | CARPHA | N | N | N | N | N | N | 23.84 | 26-Apr-21 | 29-Apr-21 | 13-Oct-21 | 01-May-21 |           |
| C19IMPACT_0506 | Trinidad and Tobago | 22-Apr-21 | CARPHA | N | N | N | N | N | N | 20.63 | 27-Apr-21 | 29-Apr-21 | 13-Oct-21 | 01-May-21 | 02-Jun-21 |
| C19IMPACT_0507 | Trinidad and Tobago | 22-Apr-21 | CARPHA | N | N | N | N | N | N | 22.18 | 27-Apr-21 | 29-Apr-21 | 13-Oct-21 | 10-May-21 | 02-Jun-21 |
| C19IMPACT_0508 | Trinidad and Tobago | 22-Apr-21 | CARPHA | N | N | N | N | Y | N | 16.02 | 27-Apr-21 | 29-Apr-21 | 11-Jun-21 | 01-May-21 | 02-Jun-21 |











|                |                                  |           |        |   |   |   |   |   |   |       |           |           |           |           |
|----------------|----------------------------------|-----------|--------|---|---|---|---|---|---|-------|-----------|-----------|-----------|-----------|
| C19IMPACT_0829 | Saint Lucia                      | 26-Mar-21 | CARPHA | N | N | N | N | N | N | 14.31 | 28-May-21 | 07-Jun-21 | 09-Jun-21 | 21-Jan-22 |
| C19IMPACT_0830 | Saint Lucia                      | 26-Mar-21 | CARPHA | N | N | N | N | N | N | 19.51 | 28-May-21 | 07-Jun-21 | 09-Jun-21 | 21-Jan-22 |
| C19IMPACT_0831 | Saint Lucia                      | 26-Mar-21 | CARPHA | N | N | N | N | N | N | 17.94 | 28-May-21 | 07-Jun-21 | 09-Jun-21 | 21-Jan-22 |
| C19IMPACT_0832 | Saint Lucia                      | 27-Mar-21 | CARPHA | N | N | N | N | N | N | 16.81 | 28-May-21 | 07-Jun-21 | 09-Jun-21 | 21-Jan-22 |
| C19IMPACT_0833 | Guyana                           | 29-Mar-21 | CARPHA | N | N | N | N | N | N | 21.10 | 28-May-21 | 07-Jun-21 | 09-Jun-21 | 21-Jan-22 |
| C19IMPACT_0834 | Guyana                           | 29-Mar-21 | CARPHA | N | N | N | N | N | N | 23.49 | 28-May-21 | 07-Jun-21 | 09-Jun-21 | 21-Jan-22 |
| C19IMPACT_0835 | Guyana                           | 30-Mar-21 | CARPHA | N | N | N | N | N | N | 16.37 | 28-May-21 | 07-Jun-21 | 09-Jun-21 | 21-Jan-22 |
| C19IMPACT_0836 | Guyana                           | 31-Mar-21 | CARPHA | N | N | N | N | N | N | 14.37 | 28-May-21 | 07-Jun-21 | 09-Jun-21 | 21-Jan-22 |
| C19IMPACT_0837 | Guyana                           | 01-Apr-21 | CARPHA | N | N | N | N | N | N | 18.68 | 28-May-21 | 07-Jun-21 | 09-Jun-21 | 21-Jan-22 |
| C19IMPACT_0838 | Turks and Caicos Islands         | 08-Apr-21 | CARPHA | N | N | N | N | N | N | 18.54 | 28-May-21 | 07-Jun-21 | 09-Jun-21 | 21-Jan-22 |
| C19IMPACT_0839 | Turks and Caicos Islands         | 08-Apr-21 | CARPHA | N | N | N | N | N | N | 18.62 | 28-May-21 | 07-Jun-21 | 09-Jun-21 | 21-Jan-22 |
| C19IMPACT_0840 | Turks and Caicos Islands         | 20-Apr-21 | CARPHA | N | N | N | N | N | N | 20.82 | 28-May-21 | 07-Jun-21 | 09-Jun-21 | 21-Jan-22 |
| C19IMPACT_0841 | Saint Lucia                      | 23-Apr-21 | CARPHA | N | N | N | N | N | N | 17.91 | 28-May-21 | 07-Jun-21 | 09-Jun-21 | 21-Jan-22 |
| C19IMPACT_0842 | Saint Lucia                      | 23-Apr-21 | CARPHA | N | N | N | N | N | N | 15.25 | 28-May-21 | 07-Jun-21 | 09-Jun-21 | 21-Jan-22 |
| C19IMPACT_0843 | Saint Lucia                      | 24-Apr-21 | CARPHA | N | N | N | N | N | N | 18.72 | 28-May-21 | 07-Jun-21 | 09-Jun-21 | 21-Jan-22 |
| C19IMPACT_0844 | Saint Lucia                      | 24-Apr-21 | CARPHA | N | N | N | N | N | N | 17.72 | 28-May-21 | 07-Jun-21 | 09-Jun-21 | 21-Jan-22 |
| C19IMPACT_0845 | Saint Lucia                      | 24-Apr-21 | CARPHA | N | N | N | N | N | N | 21.90 | 28-May-21 | 07-Jun-21 | 09-Jun-21 | 21-Jan-22 |
| C19IMPACT_0846 | Saint Lucia                      | 24-Apr-21 | CARPHA | N | N | N | N | N | N | 15.20 | 28-May-21 | 07-Jun-21 | 09-Jun-21 | 21-Jan-22 |
| C19IMPACT_0847 | Saint Lucia                      | 24-Apr-21 | CARPHA | N | N | N | N | N | N | 16.18 | 28-May-21 | 07-Jun-21 | 09-Jun-21 | 21-Jan-22 |
| C19IMPACT_0848 | Saint Lucia                      | 24-Apr-21 | CARPHA | N | N | N | N | N | N | 17.89 | 28-May-21 | 07-Jun-21 | 09-Jun-21 | 21-Jan-22 |
| C19IMPACT_0849 | Saint Lucia                      | 24-Apr-21 | CARPHA | N | N | N | N | N | N | 18.68 | 28-May-21 | 07-Jun-21 | 09-Jun-21 | 21-Jan-22 |
| C19IMPACT_0850 | Saint Lucia                      | 24-Apr-21 | CARPHA | N | N | N | N | N | N | 15.24 | 28-May-21 | 07-Jun-21 | 09-Jun-21 | 21-Jan-22 |
| C19IMPACT_0851 | Saint Lucia                      | 24-Apr-21 | CARPHA | N | N | N | N | N | N | 15.41 | 28-May-21 | 07-Jun-21 | 09-Jun-21 | 21-Jan-22 |
| C19IMPACT_0852 | Saint Lucia                      | 24-Apr-21 | CARPHA | N | N | N | N | N | N | 16.73 | 28-May-21 | 07-Jun-21 | 09-Jun-21 | 21-Jan-22 |
| C19IMPACT_0853 | Saint Lucia                      | 24-Apr-21 | CARPHA | N | N | N | N | N | N | 17.02 | 28-May-21 | 07-Jun-21 | 09-Jun-21 | 21-Jan-22 |
| C19IMPACT_0854 | Barbados                         | 25-Apr-21 | CARPHA | N | N | N | N | N | N | 17.04 | 28-May-21 | 07-Jun-21 | 09-Jun-21 | 20-Jun-21 |
| C19IMPACT_0855 | Barbados                         | 25-Apr-21 | CARPHA | N | N | N | N | N | N | 23.48 | 28-May-21 | 07-Jun-21 | 09-Jun-21 | 20-Jun-21 |
| C19IMPACT_0856 | British Virgin Islands           | 02-May-21 | CARPHA | N | N | N | N | N | N | 14.61 | 28-May-21 | 07-Jun-21 | 09-Jun-21 | 21-Jan-22 |
| C19IMPACT_0857 | Turks and Caicos Islands         | 03-May-21 | CARPHA | N | N | N | N | N | N | 17.48 | 28-May-21 | 07-Jun-21 | 09-Jun-21 | 21-Jan-22 |
| C19IMPACT_0858 | Turks and Caicos Islands         | 04-May-21 | CARPHA | N | N | N | N | N | N | 17.06 | 28-May-21 | 07-Jun-21 | 09-Jun-21 | 21-Jan-22 |
| C19IMPACT_0859 | Turks and Caicos Islands         | 07-May-21 | CARPHA | N | N | N | N | N | N | 13.77 | 28-May-21 | 07-Jun-21 | 09-Jun-21 | 21-Jan-22 |
| C19IMPACT_0860 | British Virgin Islands           | 09-May-21 | CARPHA | N | N | N | N | N | N | 18.84 | 28-May-21 | 07-Jun-21 | 09-Jun-21 | 21-Jan-22 |
| C19IMPACT_0861 | Turks and Caicos Islands         | 09-May-21 | CARPHA | N | N | N | N | N | N | 25.04 | 28-May-21 | 07-Jun-21 | 09-Jun-21 | 21-Jan-22 |
| C19IMPACT_0862 | Anguilla                         | 10-May-21 | CARPHA | N | N | N | N | N | N | 18.55 | 28-May-21 | 07-Jun-21 | 09-Jun-21 | 21-Jan-22 |
| C19IMPACT_0863 | Anguilla                         | 10-May-21 | CARPHA | N | N | N | N | N | N | 22.13 | 28-May-21 | 07-Jun-21 | 09-Jun-21 | 21-Jan-22 |
| C19IMPACT_0864 | British Virgin Islands           | 11-May-21 | CARPHA | N | N | N | N | N | N | 17.72 | 28-May-21 | 07-Jun-21 | 09-Jun-21 | 21-Jan-22 |
| C19IMPACT_0865 | Turks and Caicos Islands         | 12-May-21 | CARPHA | N | N | N | N | N | N | 20.82 | 28-May-21 | 07-Jun-21 | 09-Jun-21 | 21-Jan-22 |
| C19IMPACT_0866 | Turks and Caicos Islands         | 13-May-21 | CARPHA | N | N | N | N | N | N | 18.67 | 28-May-21 | 07-Jun-21 | 09-Jun-21 | 21-Jan-22 |
| C19IMPACT_0867 | Turks and Caicos Islands         | 14-May-21 | CARPHA | N | N | N | N | N | N | 22.01 | 28-May-21 | 07-Jun-21 | 09-Jun-21 | 21-Jan-22 |
| C19IMPACT_0868 | Trinidad and Tobago              | 25-May-21 | CARPHA | N | N | N | N | N | N | 19.83 | 28-May-21 | 07-Jun-21 | 11-Jun-21 | 09-Jun-21 |
| C19IMPACT_0869 | Trinidad and Tobago              | 25-May-21 | CARPHA | N | N | N | N | Y | N | 17.55 | 28-May-21 | 07-Jun-21 | 11-Jun-21 | 09-Jun-21 |
| C19IMPACT_0870 | Saint Lucia                      |           | CARPHA | N | N | N | N | Y | N | 20.02 | 28-May-21 | 07-Jun-21 | 09-Jun-21 | 21-Jan-22 |
| C19IMPACT_0871 | Barbados                         | 04-May-21 | CARPHA | N | N | N | N | N | N | 15.09 | 02-Jun-21 | 08-Jun-21 | 15-Jun-21 | 24-Jun-21 |
| C19IMPACT_0872 | Barbados                         | 04-May-21 | CARPHA | N | N | N | N | N | N | 21.38 | 02-Jun-21 | 08-Jun-21 | 15-Jun-21 | 24-Jun-21 |
| C19IMPACT_0873 | Barbados                         | 05-May-21 | CARPHA | N | N | N | N | N | N | 20.07 | 02-Jun-21 | 08-Jun-21 | 15-Jun-21 | 24-Jun-21 |
| C19IMPACT_0874 | Barbados                         | 08-May-21 | CARPHA | N | N | N | N | N | N | 21.59 | 02-Jun-21 | 08-Jun-21 | 15-Jun-21 | 24-Jun-21 |
| C19IMPACT_0875 | Trinidad and Tobago              | 20-May-21 | MoH    | N | N | N | N | N | N | 19.16 | 02-Jun-21 | 08-Jun-21 | 18-Jun-21 | 15-Jun-21 |
| C19IMPACT_0876 | Barbados                         | 21-May-21 | CARPHA | N | N | N | N | N | N | 23.48 | 02-Jun-21 | 08-Jun-21 | 15-Jun-21 | 24-Jun-21 |
| C19IMPACT_0877 | Barbados                         | 22-May-21 | CARPHA | N | N | N | N | N | N | 22.92 | 02-Jun-21 | 08-Jun-21 | 15-Jun-21 | 20-Jun-21 |
| C19IMPACT_0878 | Barbados                         | 24-May-21 | CARPHA | N | N | N | N | N | N | 20.64 | 02-Jun-21 | 08-Jun-21 | 15-Jun-21 | 24-Jun-21 |
| C19IMPACT_0879 | Saint Vincent and the Grenadines | 24-May-21 | CARPHA | N | N | N | N | N | N | 20.62 | 02-Jun-21 | 08-Jun-21 | 15-Jun-21 | 24-Jun-21 |
| C19IMPACT_0880 | Saint Vincent and the Grenadines | 25-May-21 | CARPHA | N | N | N | N | N | N | 14.23 | 02-Jun-21 | 08-Jun-21 | 15-Jun-21 | 24-Jun-21 |
| C19IMPACT_0881 | Saint Vincent and the Grenadines | 25-May-21 | CARPHA | N | N | N | N | N | N | 15.39 | 02-Jun-21 | 08-Jun-21 | 15-Jun-21 | 24-Jun-21 |
| C19IMPACT_0882 | Trinidad and Tobago              | 25-May-21 | MoH    | Y | N | Y | N | N | Y | 33.20 | 02-Jun-21 | 08-Jun-21 | 18-Jun-21 | 15-Jun-21 |
| C19IMPACT_0883 | Saint Vincent and the Grenadines | 26-May-21 | CARPHA | N | N | N | Y | N | N | 16.88 | 02-Jun-21 | 08-Jun-21 | 15-Jun-21 | 24-Jun-21 |
| C19IMPACT_0884 | Saint Vincent and the Grenadines | 26-May-21 | CARPHA | N | N | N | N | N | N | 18.30 | 02-Jun-21 | 08-Jun-21 | 15-Jun-21 | 24-Jun-21 |
| C19IMPACT_0885 | Trinidad and Tobago              | 26-May-21 | MoH    | N | N | N | N | N | N | 30.60 | 02-Jun-21 | 08-Jun-21 | 18-Jun-21 | 15-Jun-21 |
| C19IMPACT_0886 | Saint Vincent and the Grenadines | 27-May-21 | CARPHA | N | N | N | N | N | N | 15.18 | 02-Jun-21 | 08-Jun-21 | 15-Jun-21 | 24-Jun-21 |
| C19IMPACT_0887 | Trinidad and Tobago              | 04-May-21 | CARPHA | N | N | N | N | Y | N | 18.29 | 07-May-21 | 09-Jun-21 | 18-Jun-21 | 15-Jun-21 |
| C19IMPACT_0888 | Trinidad and Tobago              | 04-May-21 | CARPHA | N | N | N | N | N | N | 23.37 | 07-May-21 | 09-Jun-21 | 18-Jun-21 | 15-Jun-21 |
| C19IMPACT_0889 | Trinidad and Tobago              | 04-May-21 | CARPHA | N | N | N | N | N | N | 14.84 | 07-May-21 | 09-Jun-21 | 18-Jun-21 | 15-Jun-21 |
| C19IMPACT_0890 | Trinidad and Tobago              | 04-May-21 | CARPHA | N | N | N | N | Y | N | 18.25 | 07-May-21 | 09-Jun-21 | 18-Jun-21 | 15-Jun-21 |
| C19IMPACT_0891 | Trinidad and Tobago              | 04-May-21 | CARPHA | N | N | N | N | Y | N | 12.20 | 07-May-21 | 09-Jun-21 | 18-Jun-21 | 15-Jun-21 |
| C19IMPACT_0892 | Trinidad and Tobago              | 05-May-21 | CARPHA | N | N | N | N | Y | N | 21.19 | 07-May-21 | 09-Jun-21 | 18-Jun-21 | 15-Jun-21 |











|                |                                  |           |        |   |   |   |   |   |   |       |           |           |           |           |           |
|----------------|----------------------------------|-----------|--------|---|---|---|---|---|---|-------|-----------|-----------|-----------|-----------|-----------|
| C19IMPACT_1213 | Trinidad and Tobago              | 05-May-21 | CARPHA | N | N | N | N | N | N | 18.90 | 07-May-21 | 17-Jul-21 | 23-Jul-21 | 21-Jul-21 | 21-Jan-22 |
| C19IMPACT_1214 | Trinidad and Tobago              | 05-May-21 | CARPHA | N | N | N | N | N | N | 18.16 | 07-May-21 | 17-Jul-21 | 23-Jul-21 | 21-Jul-21 | 21-Jan-22 |
| C19IMPACT_1215 | Trinidad and Tobago              | 07-May-21 | CARPHA | N | N | N | N | N | N | 23.56 | 11-May-21 | 17-Jul-21 | 23-Jul-21 | 22-Jul-21 | 21-Jan-22 |
| C19IMPACT_1216 | Trinidad and Tobago              | 07-May-21 | CARPHA | N | N | N | N | N | N | 22.48 | 11-May-21 | 17-Jul-21 | 23-Jul-21 | 21-Jul-21 |           |
| C19IMPACT_1217 | Trinidad and Tobago              | 07-May-21 | CARPHA | N | N | N | N | N | N | 20.00 | 11-May-21 | 17-Jul-21 | 23-Jul-21 | 21-Jul-21 |           |
| C19IMPACT_1218 | Trinidad and Tobago              | 07-May-21 | CARPHA | N | N | N | N | N | N | 14.79 | 11-May-21 | 17-Jul-21 | 23-Jul-21 | 21-Jul-21 | 21-Jan-22 |
| C19IMPACT_1219 | Trinidad and Tobago              | 07-May-21 | CARPHA | N | N | N | N | N | N | 20.77 | 11-May-21 | 17-Jul-21 | 23-Jul-21 | 22-Jul-21 | 21-Jan-22 |
| C19IMPACT_1220 | Trinidad and Tobago              | 07-May-21 | CARPHA | N | N | N | N | N | N | 15.32 | 11-May-21 | 17-Jul-21 | 23-Jul-21 | 22-Jul-21 | 21-Jan-22 |
| C19IMPACT_1221 | Trinidad and Tobago              | 07-May-21 | CARPHA | N | N | N | N | N | N | 21.05 | 11-May-21 | 17-Jul-21 | 23-Jul-21 | 22-Jul-21 | 21-Jan-22 |
| C19IMPACT_1222 | Trinidad and Tobago              | 07-May-21 | CARPHA | N | N | N | N | N | N | 13.20 | 11-May-21 | 17-Jul-21 | 23-Jul-21 | 22-Jul-21 | 21-Jan-22 |
| C19IMPACT_1223 | Trinidad and Tobago              | 07-May-21 | CARPHA | N | N | N | N | N | N | 17.12 | 11-May-21 | 17-Jul-21 | 23-Jul-21 | 22-Jul-21 | 21-Jan-22 |
| C19IMPACT_1224 | Trinidad and Tobago              | 07-May-21 | CARPHA | N | N | N | N | N | N | 18.75 | 11-May-21 | 17-Jul-21 | 23-Jul-21 | 22-Jul-21 | 21-Jan-22 |
| C19IMPACT_1225 | Trinidad and Tobago              | 07-May-21 | CARPHA | N | N | N | N | N | N | 19.84 | 11-May-21 | 17-Jul-21 | 23-Jul-21 | 22-Jul-21 | 21-Jan-22 |
| C19IMPACT_1226 | Trinidad and Tobago              | 07-May-21 | CARPHA | N | N | N | N | N | N | 18.64 | 11-May-21 | 17-Jul-21 | 23-Jul-21 | 22-Jul-21 | 21-Jan-22 |
| C19IMPACT_1227 | Trinidad and Tobago              | 07-May-21 | CARPHA | N | N | N | N | N | N | 17.72 | 11-May-21 | 17-Jul-21 | 23-Jul-21 | 22-Jul-21 | 21-Jan-22 |
| C19IMPACT_1228 | Trinidad and Tobago              | 07-May-21 | CARPHA | N | N | N | N | N | N | 16.31 | 11-May-21 | 17-Jul-21 | 23-Jul-21 | 22-Jul-21 | 21-Jan-22 |
| C19IMPACT_1229 | Trinidad and Tobago              | 07-May-21 | CARPHA | N | N | N | N | N | N | 15.55 | 11-May-21 | 17-Jul-21 | 23-Jul-21 | 22-Jul-21 | 21-Jan-22 |
| C19IMPACT_1230 | Trinidad and Tobago              | 07-May-21 | CARPHA | N | N | N | N | N | N | 12.27 | 11-May-21 | 17-Jul-21 | 23-Jul-21 | 22-Jul-21 | 21-Jan-22 |
| C19IMPACT_1231 | Trinidad and Tobago              | 07-May-21 | CARPHA | N | N | N | N | N | N | 14.83 | 11-May-21 | 17-Jul-21 | 23-Jul-21 | 22-Jul-21 | 21-Jan-22 |
| C19IMPACT_1232 | Trinidad and Tobago              | 08-May-21 | CARPHA | N | N | Y | N | N | N | 19.80 | 11-May-21 | 17-Jul-21 | 23-Jul-21 | 22-Jul-21 | 21-Jan-22 |
| C19IMPACT_1233 | Trinidad and Tobago              | 08-May-21 | CARPHA | N | N | N | N | N | N | 14.57 | 11-May-21 | 17-Jul-21 | 23-Jul-21 | 22-Jul-21 | 21-Jan-22 |
| C19IMPACT_1234 | Antigua and Barbuda              | 09-May-21 | CARPHA | N | N | N | N | N | N | 23.17 | 12-Jul-21 | 17-Jul-21 |           | 21-Jul-21 | 23-Aug-21 |
| C19IMPACT_1235 | Trinidad and Tobago              | 09-May-21 | CARPHA | N | N | Y | N | N | N | 17.15 | 11-May-21 | 17-Jul-21 | 23-Jul-21 | 22-Jul-21 | 21-Jan-22 |
| C19IMPACT_1236 | Trinidad and Tobago              | 12-May-21 | CARPHA | N | N | N | N | N | N | 15.60 | 28-May-21 | 17-Jul-21 | 23-Jul-21 | 21-Jul-21 |           |
| C19IMPACT_1237 | Trinidad and Tobago              | 12-May-21 | CARPHA | N | N | N | N | N | N | 24.83 | 28-May-21 | 17-Jul-21 | 23-Jul-21 | 21-Jul-21 |           |
| C19IMPACT_1238 | Trinidad and Tobago              | 12-May-21 | CARPHA | N | N | N | N | N | N | 13.84 | 28-May-21 | 17-Jul-21 | 23-Jul-21 | 21-Jul-21 | 23-Aug-21 |
| C19IMPACT_1239 | Trinidad and Tobago              | 12-May-21 | CARPHA | N | N | N | N | N | N | 23.55 | 28-May-21 | 17-Jul-21 | 23-Jul-21 | 21-Jul-21 |           |
| C19IMPACT_1240 | Trinidad and Tobago              | 12-May-21 | CARPHA | N | N | N | N | N | N | 16.11 | 28-May-21 | 17-Jul-21 | 23-Jul-21 | 21-Jul-21 | 21-Jan-22 |
| C19IMPACT_1241 | Trinidad and Tobago              | 12-May-21 | CARPHA | N | N | N | N | N | N | 12.88 | 28-May-21 | 17-Jul-21 | 23-Jul-21 | 21-Jul-21 | 21-Jan-22 |
| C19IMPACT_1242 | Trinidad and Tobago              | 12-May-21 | CARPHA | N | N | N | N | N | N | 18.98 | 28-May-21 | 17-Jul-21 | 23-Jul-21 | 21-Jul-21 | 21-Jan-22 |
| C19IMPACT_1243 | Antigua and Barbuda              | 14-May-21 | CARPHA | N | N | N | N | N | N | 14.41 | 12-Jul-21 | 17-Jul-21 |           | 21-Jul-21 | 23-Aug-21 |
| C19IMPACT_1244 | Trinidad and Tobago              | 14-May-21 | CARPHA | N | N | N | N | N | N | 14.46 | 28-May-21 | 17-Jul-21 | 23-Jul-21 | 21-Jul-21 | 21-Jan-22 |
| C19IMPACT_1245 | Antigua and Barbuda              | 20-May-21 | CARPHA | N | N | N | N | N | N | 14.09 | 12-Jul-21 | 17-Jul-21 |           | 21-Jul-21 | 23-Aug-21 |
| C19IMPACT_1246 | Antigua and Barbuda              | 02-Jul-21 | CARPHA | N | N | N | N | N | N | 17.89 | 12-Jul-21 | 17-Jul-21 |           | 21-Jul-21 | 23-Aug-21 |
| C19IMPACT_1247 | Trinidad and Tobago              | 06-Jul-21 | CARPHA | N | N | N | N | N | Y | 19.51 | 14-Jul-21 | 17-Jul-21 | 23-Jul-21 | 21-Jul-21 |           |
| C19IMPACT_1248 | Montserrat                       | 08-Jul-21 | CARPHA | N | N | N | N | N | Y | 21.13 | 16-Jul-21 | 17-Jul-21 |           | 21-Jul-21 | 23-Aug-21 |
| C19IMPACT_1249 | Trinidad and Tobago              | 09-Jul-21 | MoH    | N | N | N | N | Y | Y | 23.00 | 13-Jul-21 | 17-Jul-21 | 23-Jul-21 |           |           |
| C19IMPACT_1250 | Trinidad and Tobago              | 09-Jul-21 | CARPHA | N | N | N | N | N | Y | 16.95 | 14-Jul-21 | 17-Jul-21 | 23-Jul-21 | 21-Jul-21 |           |
| C19IMPACT_1251 | Trinidad and Tobago              | 09-Jul-21 | MoH    | N | N | Y | N | N | Y | 15.00 | 13-Jul-21 | 17-Jul-21 | 23-Jul-21 |           | 23-Aug-21 |
| C19IMPACT_1252 | Trinidad and Tobago              | 09-Jul-21 | MoH    | N | N | Y | N | Y | Y | 19.00 | 13-Jul-21 | 17-Jul-21 | 23-Jul-21 |           | 23-Aug-21 |
| C19IMPACT_1253 | Trinidad and Tobago              | 09-Jul-21 | MoH    | N | N | N | N | Y | Y | 18.00 | 13-Jul-21 | 17-Jul-21 | 23-Jul-21 |           |           |
| C19IMPACT_1254 | Trinidad and Tobago              | 13-Jul-21 | CARPHA | N | N | N | N | N | Y | 10.98 | 16-Jul-21 | 17-Jul-21 | 23-Jul-21 | 21-Jul-21 |           |
| C19IMPACT_1255 | Saint Vincent and the Grenadines | 13-Jul-21 | CARPHA | N | N | N | N | N | Y | 17.81 | 16-Jul-21 | 17-Jul-21 |           | 21-Jul-21 |           |
| C19IMPACT_1256 | Trinidad and Tobago              | 14-Jul-21 | MoH    | N | N | N | N | N | N | 18.00 | 16-Jul-21 | 17-Jul-21 | 23-Jul-21 |           |           |
| C19IMPACT_1257 | Trinidad and Tobago              | 14-Jul-21 | MoH    | N | N | Y | N | N | Y | 17.00 | 16-Jul-21 | 17-Jul-21 | 23-Jul-21 |           | 23-Aug-21 |
| C19IMPACT_1258 | Trinidad and Tobago              | 15-Jul-21 | MoH    | N | N | N | N | Y | N |       | 16-Jul-21 | 17-Jul-21 | 23-Jul-21 |           |           |
| C19IMPACT_1259 | Barbados                         | 04-Jul-21 | CARPHA | N | N | N | N | N | Y | 22.22 | 20-Jul-21 | 22-Jul-21 |           | 26-Jul-21 |           |
| C19IMPACT_1260 | Barbados                         | 04-Jul-21 | CARPHA | N | N | N | N | N | Y | 19.04 | 20-Jul-21 | 22-Jul-21 |           | 26-Jul-21 | 23-Aug-21 |
| C19IMPACT_1261 | Barbados                         | 06-Jul-21 | CARPHA | N | N | N | N | N | Y | 17.40 | 20-Jul-21 | 22-Jul-21 |           | 26-Jul-21 | 23-Aug-21 |
| C19IMPACT_1262 | Barbados                         | 06-Jul-21 | CARPHA | N | N | N | N | N | Y | 17.29 | 20-Jul-21 | 22-Jul-21 |           | 26-Jul-21 | 23-Aug-21 |
| C19IMPACT_1263 | Barbados                         | 07-Jul-21 | CARPHA | N | N | N | N | N | Y | 15.09 | 20-Jul-21 | 22-Jul-21 |           | 26-Jul-21 | 23-Aug-21 |
| C19IMPACT_1264 | Barbados                         | 10-Jul-21 | CARPHA | N | N | N | N | N | Y | 25.06 | 20-Jul-21 | 22-Jul-21 |           | 26-Jul-21 |           |
| C19IMPACT_1265 | Barbados                         | 10-Jul-21 | CARPHA | N | N | N | N | N | Y | 25.24 | 20-Jul-21 | 22-Jul-21 |           | 26-Jul-21 |           |
| C19IMPACT_1266 | Barbados                         | 10-Jul-21 | CARPHA | N | N | N | N | N | Y | 15.00 | 20-Jul-21 | 22-Jul-21 |           | 26-Jul-21 | 23-Aug-21 |
| C19IMPACT_1267 | Barbados                         | 10-Jul-21 | CARPHA | N | N | N | N | N | Y | 19.29 | 20-Jul-21 | 22-Jul-21 |           | 26-Jul-21 | 23-Aug-21 |
| C19IMPACT_1268 | Barbados                         | 10-Jul-21 | CARPHA | N | N | N | N | Y | Y | 18.27 | 20-Jul-21 | 22-Jul-21 |           | 26-Jul-21 | 23-Aug-21 |
| C19IMPACT_1269 | Barbados                         | 10-Jul-21 | CARPHA | N | N | N | N | N | Y | 15.62 | 20-Jul-21 | 22-Jul-21 |           | 26-Jul-21 | 23-Aug-21 |
| C19IMPACT_1270 | Barbados                         | 10-Jul-21 | CARPHA | N | N | N | N | N | N | 21.78 | 20-Jul-21 | 22-Jul-21 |           | 29-Oct-21 | 21-Jan-22 |
| C19IMPACT_1271 | Barbados                         | 11-Jul-21 | CARPHA | N | N | N | N | N | Y | 14.87 | 20-Jul-21 | 22-Jul-21 |           | 26-Jul-21 | 23-Aug-21 |
| C19IMPACT_1272 | Trinidad and Tobago              | 14-Jul-21 | CARPHA | N | N | Y | N | N | Y | 14.87 | 20-Jul-21 | 22-Jul-21 | 13-Oct-21 | 26-Jul-21 | 23-Aug-21 |
| C19IMPACT_1273 | Trinidad and Tobago              | 14-Jul-21 | CARPHA | N | N | Y | N | N | Y | 21.84 | 20-Jul-21 | 22-Jul-21 | 13-Oct-21 | 26-Jul-21 | 23-Aug-21 |
| C19IMPACT_1274 | Trinidad and Tobago              | 14-Jul-21 | CARPHA | N | N | Y | N | N | Y | 17.95 | 20-Jul-21 | 22-Jul-21 | 13-Oct-21 | 26-Jul-21 | 23-Aug-21 |
| C19IMPACT_1275 | Trinidad and Tobago              | 17-Jul-21 | MoH    | Y | N | Y | N | N | Y | 19.00 | 20-Jul-21 | 22-Jul-21 | 13-Oct-21 |           | 23-Aug-21 |
| C19IMPACT_1276 | Trinidad and Tobago              | 17-Jul-21 | MoH    | Y | N | Y | N | Y | Y | 15.00 | 20-Jul-21 | 22-Jul-21 | 13-Oct-21 |           | 23-Aug-21 |

|                |                                  |           |        |   |   |   |   |   |   |       |       |           |           |           |           |           |
|----------------|----------------------------------|-----------|--------|---|---|---|---|---|---|-------|-------|-----------|-----------|-----------|-----------|-----------|
| C19IMPACT_1277 | Trinidad and Tobago              | 17-Jul-21 | MoH    | Y | N | Y | N | Y | Y | 25.00 |       | 20-Jul-21 | 22-Jul-21 | 13-Oct-21 |           | 23-Aug-21 |
| C19IMPACT_1278 | Trinidad and Tobago              | 18-Jul-21 | MoH    | N | N | N | N | Y | Y | 23.00 |       | 20-Jul-21 | 22-Jul-21 | 13-Oct-21 |           |           |
| C19IMPACT_1279 | Trinidad and Tobago              | 18-Jul-21 | MoH    | N | N | Y | N | N | Y | 16.00 |       | 20-Jul-21 | 22-Jul-21 | 13-Oct-21 |           | 23-Aug-21 |
| C19IMPACT_1280 | Trinidad and Tobago              | 19-Jul-21 | MoH    | N | N | N | N | Y | Y |       |       | 20-Jul-21 | 22-Jul-21 | 13-Oct-21 |           |           |
| C19IMPACT_1281 | Turks and Caicos Islands         | 25-Jun-21 | CARPHA | N | N | N | N | N | Y | 19.45 |       | 22-Jul-21 | 28-Jul-21 |           | 30-Jul-21 | 23-Aug-21 |
| C19IMPACT_1282 | Turks and Caicos Islands         | 05-Jul-21 | CARPHA | N | N | N | N | N | Y | 18.29 |       | 22-Jul-21 | 28-Jul-21 |           | 30-Jul-21 | 23-Aug-21 |
| C19IMPACT_1283 | Turks and Caicos Islands         | 08-Jul-21 | CARPHA | N | N | N | N | N | Y | 17.83 |       | 22-Jul-21 | 28-Jul-21 |           | 30-Jul-21 |           |
| C19IMPACT_1284 | Antigua and Barbuda              | 10-Jul-21 | CARPHA | N | N | N | N | N | Y | 17.71 |       | 22-Jul-21 | 28-Jul-21 |           | 30-Jul-21 |           |
| C19IMPACT_1285 | Turks and Caicos Islands         | 11-Jul-21 | CARPHA | N | N | N | N | N | Y | 18.30 |       | 22-Jul-21 | 28-Jul-21 |           | 30-Jul-21 |           |
| C19IMPACT_1286 | Turks and Caicos Islands         | 12-Jul-21 | CARPHA | N | N | N | N | N | Y | 16.51 |       | 22-Jul-21 | 28-Jul-21 |           | 30-Jul-21 | 23-Aug-21 |
| C19IMPACT_1287 | Turks and Caicos Islands         | 12-Jul-21 | CARPHA | N | N | N | N | N | Y | 16.64 |       | 22-Jul-21 | 28-Jul-21 |           | 30-Jul-21 | 23-Aug-21 |
| C19IMPACT_1288 | Turks and Caicos Islands         | 12-Jul-21 | CARPHA | N | N | N | N | N | Y | 19.22 |       | 22-Jul-21 | 28-Jul-21 |           | 30-Jul-21 | 23-Aug-21 |
| C19IMPACT_1289 | Turks and Caicos Islands         | 12-Jul-21 | CARPHA | N | N | N | N | N | Y | 22.26 |       | 22-Jul-21 | 28-Jul-21 |           | 30-Jul-21 | 23-Aug-21 |
| C19IMPACT_1290 | Antigua and Barbuda              | 13-Jul-21 | CARPHA | N | N | N | N | N | Y | 26.67 |       | 22-Jul-21 | 28-Jul-21 |           | 30-Jul-21 |           |
| C19IMPACT_1291 | Antigua and Barbuda              | 14-Jul-21 | CARPHA | N | N | N | N | N | Y | 15.34 |       | 22-Jul-21 | 28-Jul-21 |           | 30-Jul-21 | 23-Aug-21 |
| C19IMPACT_1292 | Antigua and Barbuda              | 14-Jul-21 | CARPHA | N | N | N | N | N | Y | 19.24 |       | 22-Jul-21 | 28-Jul-21 |           | 30-Jul-21 | 23-Aug-21 |
| C19IMPACT_1293 | Trinidad and Tobago              | 19-Jul-21 | CARPHA | N | N | N | N | N | Y | 19.70 |       | 22-Jul-21 | 28-Jul-21 |           | 30-Jul-21 |           |
| C19IMPACT_1294 | Trinidad and Tobago              | 19-Jul-21 | CARPHA | N | N | N | N | N | Y | 23.57 |       | 22-Jul-21 | 28-Jul-21 |           | 30-Jul-21 | 23-Aug-21 |
| C19IMPACT_1295 | Trinidad and Tobago              | 19-Jul-21 | CARPHA | Y | N | Y | N | N | Y | 20.41 |       | 22-Jul-21 | 28-Jul-21 |           | 30-Jul-21 | 23-Aug-21 |
| C19IMPACT_1296 | Trinidad and Tobago              | 19-Jul-21 | CARPHA | N | Y | Y | N | Y | Y | 17.89 |       | 22-Jul-21 | 28-Jul-21 |           | 30-Jul-21 | 23-Aug-21 |
| C19IMPACT_1297 | Trinidad and Tobago              | 21-Jul-21 | MoH    | N | N | N | N | Y | Y | 12.00 |       | 22-Jul-21 | 28-Jul-21 |           | 30-Jul-21 |           |
| C19IMPACT_1298 | Trinidad and Tobago              | 21-Jul-21 | MoH    | N | N | N | N | N | Y | 15.00 |       | 22-Jul-21 | 28-Jul-21 |           | 30-Jul-21 |           |
| C19IMPACT_1299 | Trinidad and Tobago              | 21-Jul-21 | MoH    | N | N | N | N | N | Y | 14.00 |       | 23-Jul-21 | 28-Jul-21 |           | 30-Jul-21 |           |
| C19IMPACT_1300 | Trinidad and Tobago              | 22-Jul-21 | MoH    | N | N | N | N | N | Y |       |       | 23-Jul-21 | 28-Jul-21 |           | 30-Jul-21 |           |
| C19IMPACT_1301 | Trinidad and Tobago              | 22-Jul-21 | MoH    | N | N | N | N | N | Y |       |       | 23-Jul-21 | 28-Jul-21 |           | 30-Jul-21 |           |
| C19IMPACT_1302 | Trinidad and Tobago              | 22-Jul-21 | MoH    | N | N | N | N | N | Y |       |       | 23-Jul-21 | 28-Jul-21 | 13-Oct-21 |           |           |
| C19IMPACT_1303 | British Virgin Islands           | 18-Jul-21 | CARPHA | N | N | N | N | N | N | 24.54 |       | 27-Jul-21 | 29-Jul-21 |           | 30-Jul-21 |           |
| C19IMPACT_1304 | British Virgin Islands           | 18-Jul-21 | CARPHA | N | N | N | N | N | N | 16.86 |       | 27-Jul-21 | 29-Jul-21 |           | 30-Jul-21 | 21-Jan-22 |
| C19IMPACT_1305 | Anguilla                         | 18-Jul-21 | CARPHA | N | N | N | N | N | N | 14.53 |       | 27-Jul-21 | 29-Jul-21 |           | 30-Jul-21 | 23-Aug-21 |
| C19IMPACT_1306 | Anguilla                         | 18-Jul-21 | CARPHA | N | N | N | N | N | N | 18.35 |       | 27-Jul-21 | 29-Jul-21 |           | 30-Jul-21 | 23-Aug-21 |
| C19IMPACT_1307 | Trinidad and Tobago              | 19-Jul-21 | MoH    | N | N | N | N | N | Y |       | 11.15 | 27-Jul-21 | 29-Jul-21 |           | 30-Jul-21 |           |
| C19IMPACT_1308 | Trinidad and Tobago              | 19-Jul-21 | MoH    | N | N | N | N | N | Y |       | 4.27  | 27-Jul-21 | 29-Jul-21 |           | 30-Jul-21 | 21-Jan-22 |
| C19IMPACT_1309 | Trinidad and Tobago              | 19-Jul-21 | MoH    | N | N | N | N | N | Y |       | 5.86  | 27-Jul-21 | 29-Jul-21 |           | 30-Jul-21 | 21-Jan-22 |
| C19IMPACT_1310 | Trinidad and Tobago              | 19-Jul-21 | MoH    | N | N | N | N | N | N | 15.00 |       | 27-Jul-21 | 29-Jul-21 |           | 30-Jul-21 | 21-Jan-22 |
| C19IMPACT_1311 | British Virgin Islands           | 19-Jul-21 | CARPHA | N | N | N | N | N | N | 23.44 |       | 27-Jul-21 | 29-Jul-21 |           | 30-Jul-21 | 21-Jan-22 |
| C19IMPACT_1312 | British Virgin Islands           | 19-Jul-21 | CARPHA | N | N | N | N | N | N | 11.17 |       | 27-Jul-21 | 29-Jul-21 |           | 30-Jul-21 | 21-Jan-22 |
| C19IMPACT_1313 | British Virgin Islands           | 19-Jul-21 | CARPHA | N | N | N | N | N | N | 19.16 |       | 27-Jul-21 | 29-Jul-21 |           | 30-Jul-21 | 21-Jan-22 |
| C19IMPACT_1314 | British Virgin Islands           | 19-Jul-21 | CARPHA | N | N | N | N | N | N | 16.65 |       | 27-Jul-21 | 29-Jul-21 |           | 30-Jul-21 | 21-Jan-22 |
| C19IMPACT_1315 | British Virgin Islands           | 19-Jul-21 | CARPHA | N | N | N | N | N | N | 16.25 |       | 27-Jul-21 | 29-Jul-21 |           | 30-Jul-21 | 21-Jan-22 |
| C19IMPACT_1316 | Saint Vincent and the Grenadines | 19-Jul-21 | CARPHA | N | N | N | N | N | N | 15.68 |       | 27-Jul-21 | 29-Jul-21 |           | 30-Jul-21 | 21-Jan-22 |
| C19IMPACT_1317 | Saint Vincent and the Grenadines | 19-Jul-21 | CARPHA | N | N | N | N | N | N | 20.62 |       | 27-Jul-21 | 29-Jul-21 |           | 30-Jul-21 | 21-Jan-22 |
| C19IMPACT_1318 | Saint Vincent and the Grenadines | 19-Jul-21 | CARPHA | N | N | N | N | N | N | 14.98 |       | 27-Jul-21 | 29-Jul-21 |           | 30-Jul-21 | 21-Jan-22 |
| C19IMPACT_1319 | Trinidad and Tobago              | 19-Jul-21 | MoH    | N | N | N | N | N | N |       | 19.84 | 27-Jul-21 | 29-Jul-21 | 13-Oct-21 |           |           |
| C19IMPACT_1320 | Trinidad and Tobago              | 20-Jul-21 | CARPHA | N | N | N | N | N | Y | 21.43 |       | 23-Jul-21 | 29-Jul-21 |           | 30-Jul-21 |           |
| C19IMPACT_1321 | Trinidad and Tobago              | 20-Jul-21 | CARPHA | N | N | N | N | N | Y | 24.19 |       | 23-Jul-21 | 29-Jul-21 |           | 30-Jul-21 |           |
| C19IMPACT_1322 | Trinidad and Tobago              | 20-Jul-21 | CARPHA | N | N | N | N | N | Y | 24.47 |       | 23-Jul-21 | 29-Jul-21 |           | 30-Jul-21 |           |
| C19IMPACT_1323 | Trinidad and Tobago              | 20-Jul-21 | MoH    | N | N | N | N | N | Y |       | 8.00  | 27-Jul-21 | 29-Jul-21 |           | 30-Jul-21 | 21-Jan-22 |
| C19IMPACT_1324 | Trinidad and Tobago              | 20-Jul-21 | MoH    | N | N | N | N | N | Y |       | 3.00  | 27-Jul-21 | 29-Jul-21 |           | 30-Jul-21 | 21-Jan-22 |
| C19IMPACT_1325 | Trinidad and Tobago              | 20-Jul-21 | MoH    | N | N | N | N | N | Y |       | 5.00  | 27-Jul-21 | 29-Jul-21 |           | 30-Jul-21 | 21-Jan-22 |
| C19IMPACT_1326 | Saint Vincent and the Grenadines | 20-Jul-21 | CARPHA | N | N | N | N | N | N | 17.31 |       | 27-Jul-21 | 29-Jul-21 |           | 30-Jul-21 | 21-Jan-22 |
| C19IMPACT_1327 | Trinidad and Tobago              | 20-Jul-21 | MoH    | N | N | N | N | N | Y |       | 8.86  | 27-Jul-21 | 29-Jul-21 |           | 30-Jul-21 | 21-Jan-22 |
| C19IMPACT_1328 | Trinidad and Tobago              | 20-Jul-21 | MoH    | N | N | N | N | N | Y |       | 6.37  | 27-Jul-21 | 29-Jul-21 |           | 30-Jul-21 | 21-Jan-22 |
| C19IMPACT_1329 | Trinidad and Tobago              | 21-Jul-21 | MoH    | N | N | N | N | N | Y |       | 4.00  | 27-Jul-21 | 29-Jul-21 |           | 30-Jul-21 | 21-Jan-22 |
| C19IMPACT_1330 | Trinidad and Tobago              | 21-Jul-21 | MoH    | N | N | N | N | N | Y |       | 13.00 | 27-Jul-21 | 29-Jul-21 |           | 30-Jul-21 | 21-Jan-22 |
| C19IMPACT_1331 | Trinidad and Tobago              | 21-Jul-21 | CARPHA | N | N | Y | N | N | N | 22.21 |       | 27-Jul-21 | 29-Jul-21 |           | 30-Jul-21 | 21-Jan-22 |
| C19IMPACT_1332 | Trinidad and Tobago              | 21-Jul-21 | MoH    | N | N | N | Y | N | Y |       | 21.00 | 27-Jul-21 | 29-Jul-21 |           | 30-Jul-21 |           |
| C19IMPACT_1333 | Trinidad and Tobago              | 22-Jul-21 | MoH    | N | N | N | N | N | Y | 15.24 |       | 23-Jul-21 | 29-Jul-21 |           | 30-Jul-21 | 21-Jan-22 |
| C19IMPACT_1334 | Trinidad and Tobago              | 22-Jul-21 | MoH    | N | N | N | N | N | Y | 15.32 |       | 23-Jul-21 | 29-Jul-21 |           | 30-Jul-21 | 21-Jan-22 |
| C19IMPACT_1335 | Trinidad and Tobago              | 22-Jul-21 | MoH    | N | N | Y | N | N | N | 15.00 |       | 27-Jul-21 | 29-Jul-21 |           | 30-Jul-21 | 21-Jan-22 |
| C19IMPACT_1336 | Trinidad and Tobago              | 22-Jul-21 | MoH    | Y | N | Y | N | Y | N | 15.00 |       | 27-Jul-21 | 29-Jul-21 |           | 30-Jul-21 | 21-Jan-22 |
| C19IMPACT_1337 | Trinidad and Tobago              | 22-Jul-21 | MoH    | N | N | Y | N | Y | N | 18.00 |       | 27-Jul-21 | 29-Jul-21 |           | 30-Jul-21 | 21-Jan-22 |
| C19IMPACT_1338 | Trinidad and Tobago              | 23-Jul-21 | MoH    | N | N | N | N | Y | Y | 17.00 |       | 27-Jul-21 | 29-Jul-21 |           | 30-Jul-21 |           |
| C19IMPACT_1339 | Trinidad and Tobago              | 23-Jul-21 | MoH    | N | N | N | N | N | Y | 17.00 |       | 27-Jul-21 | 29-Jul-21 |           | 30-Jul-21 | 21-Jan-22 |
| C19IMPACT_1340 | Trinidad and Tobago              | 23-Jul-21 | MoH    | Y | N | Y | N | N | N | 14.00 |       | 27-Jul-21 | 29-Jul-21 |           | 30-Jul-21 | 21-Jan-22 |





|                |                        |           |        |   |   |   |   |   |   |       |           |           |           |           |
|----------------|------------------------|-----------|--------|---|---|---|---|---|---|-------|-----------|-----------|-----------|-----------|
| C19IMPACT_1469 | Barbados               | 19-Jul-21 | CARPHA | N | N | N | N | N | N | 22.04 | 04-Aug-21 | 10-Aug-21 | 12-Aug-21 | 23-Aug-21 |
| C19IMPACT_1470 | Saint Lucia            | 19-Jul-21 | CARPHA | N | N | N | N | N | N | 14.62 | 04-Aug-21 | 10-Aug-21 | 12-Aug-21 | 27-Aug-21 |
| C19IMPACT_1471 | British Virgin Islands | 19-Jul-21 | CARPHA | N | N | N | N | N | N | 19.95 | 04-Aug-21 | 10-Aug-21 | 12-Aug-21 | 27-Aug-21 |
| C19IMPACT_1472 | Barbados               | 20-Jul-21 | CARPHA | N | N | N | N | N | N | 19.27 | 04-Aug-21 | 10-Aug-21 | 12-Aug-21 | 23-Aug-21 |
| C19IMPACT_1473 | Antigua and Barbuda    | 24-Jul-21 | CARPHA | N | N | N | N | N | N | 21.82 | 04-Aug-21 | 10-Aug-21 | 12-Aug-21 | 23-Aug-21 |
| C19IMPACT_1474 | Antigua and Barbuda    | 24-Jul-21 | CARPHA | N | N | N | N | N | N | 17.20 | 04-Aug-21 | 10-Aug-21 | 12-Aug-21 | 23-Aug-21 |
| C19IMPACT_1475 | British Virgin Islands | 25-Jul-21 | CARPHA | N | N | N | N | N | N | 21.03 | 04-Aug-21 | 10-Aug-21 | 12-Aug-21 | 27-Aug-21 |
| C19IMPACT_1476 | British Virgin Islands | 25-Jul-21 | CARPHA | N | N | N | N | N | N | 17.05 | 04-Aug-21 | 10-Aug-21 | 12-Aug-21 | 27-Aug-21 |
| C19IMPACT_1477 | British Virgin Islands | 25-Jul-21 | CARPHA | N | N | N | N | N | N | 24.51 | 04-Aug-21 | 10-Aug-21 | 12-Aug-21 | 27-Aug-21 |
| C19IMPACT_1478 | British Virgin Islands | 25-Jul-21 | CARPHA | N | N | N | N | N | N | 18.49 | 04-Aug-21 | 10-Aug-21 | 12-Aug-21 | 27-Aug-21 |
| C19IMPACT_1479 | Saint Lucia            | 25-Jul-21 | CARPHA | N | N | N | N | N | N | 18.85 | 04-Aug-21 | 10-Aug-21 | 12-Aug-21 | 23-Aug-21 |
| C19IMPACT_1480 | Saint Lucia            | 25-Jul-21 | CARPHA | N | N | N | N | N | N | 17.22 | 04-Aug-21 | 10-Aug-21 | 12-Aug-21 | 23-Aug-21 |
| C19IMPACT_1481 | Antigua and Barbuda    | 25-Jul-21 | CARPHA | N | N | N | N | N | N | 18.54 | 04-Aug-21 | 10-Aug-21 | 12-Aug-21 | 27-Aug-21 |
| C19IMPACT_1482 | Antigua and Barbuda    | 25-Jul-21 | CARPHA | N | N | N | N | N | Y | 20.94 | 04-Aug-21 | 10-Aug-21 | 12-Aug-21 | 23-Aug-21 |
| C19IMPACT_1483 | Grenada                | 26-Jul-21 | CARPHA | N | N | N | N | N | N | 17.47 | 04-Aug-21 | 10-Aug-21 | 12-Aug-21 | 23-Aug-21 |
| C19IMPACT_1484 | Grenada                | 26-Jul-21 | CARPHA | N | N | N | N | N | N | 16.91 | 04-Aug-21 | 10-Aug-21 | 12-Aug-21 | 23-Aug-21 |
| C19IMPACT_1485 | Saint Lucia            | 26-Jul-21 | CARPHA | N | N | N | N | N | N | 14.76 | 04-Aug-21 | 10-Aug-21 | 12-Aug-21 | 23-Aug-21 |
| C19IMPACT_1486 | Saint Lucia            | 26-Jul-21 | CARPHA | N | N | N | N | N | N | 15.43 | 04-Aug-21 | 10-Aug-21 | 12-Aug-21 | 27-Aug-21 |
| C19IMPACT_1487 | Saint Lucia            | 26-Jul-21 | CARPHA | N | N | N | N | N | N | 14.87 | 04-Aug-21 | 10-Aug-21 | 12-Aug-21 | 27-Aug-21 |
| C19IMPACT_1488 | Grenada                | 26-Jul-21 | CARPHA | N | N | N | N | N | N | 20.11 | 04-Aug-21 | 10-Aug-21 | 12-Aug-21 | 23-Aug-21 |
| C19IMPACT_1489 | Antigua and Barbuda    | 26-Jul-21 | CARPHA | N | N | N | N | N | N | 20.78 | 04-Aug-21 | 10-Aug-21 | 12-Aug-21 | 23-Aug-21 |
| C19IMPACT_1490 | Antigua and Barbuda    | 27-Jul-21 | CARPHA | N | N | N | N | N | N | 20.20 | 04-Aug-21 | 10-Aug-21 | 12-Aug-21 | 23-Aug-21 |
| C19IMPACT_1491 | Antigua and Barbuda    | 27-Jul-21 | CARPHA | N | N | N | N | N | N | 17.30 | 04-Aug-21 | 10-Aug-21 | 12-Aug-21 | 23-Aug-21 |
| C19IMPACT_1492 | British Virgin Islands | 27-Jul-21 | CARPHA | N | N | N | N | N | N | 29.29 | 04-Aug-21 | 10-Aug-21 | 12-Aug-21 | 23-Aug-21 |
| C19IMPACT_1493 | Antigua and Barbuda    | 28-Jul-21 | CARPHA | N | N | N | N | N | N | 18.58 | 04-Aug-21 | 10-Aug-21 | 12-Aug-21 |           |
| C19IMPACT_1494 | Trinidad and Tobago    | 28-Jul-21 | MoH    | N | N | N | N | N | N | 15.00 | 05-Aug-21 | 10-Aug-21 | 13-Aug-21 | 27-Aug-21 |
| C19IMPACT_1495 | Antigua and Barbuda    | 28-Jul-21 | CARPHA | N | N | N | N | N | N | 19.99 | 04-Aug-21 | 10-Aug-21 | 12-Aug-21 | 23-Aug-21 |
| C19IMPACT_1496 | Antigua and Barbuda    | 28-Jul-21 | CARPHA | N | N | N | N | N | N | 17.37 | 04-Aug-21 | 10-Aug-21 | 12-Aug-21 | 23-Aug-21 |
| C19IMPACT_1497 | British Virgin Islands | 28-Jul-21 | CARPHA | N | N | N | N | N | N | 20.95 | 04-Aug-21 | 10-Aug-21 | 12-Aug-21 | 27-Aug-21 |
| C19IMPACT_1498 | Antigua and Barbuda    | 29-Jul-21 | CARPHA | N | N | N | N | N | N | 23.48 | 04-Aug-21 | 10-Aug-21 | 12-Aug-21 | 23-Aug-21 |
| C19IMPACT_1499 | Trinidad and Tobago    | 30-Jul-21 | MoH    | N | N | N | N | N | N | 18.00 | 05-Aug-21 | 10-Aug-21 | 13-Aug-21 | 27-Aug-21 |
| C19IMPACT_1500 | Trinidad and Tobago    | 03-Aug-21 | MoH    | N | N | N | N | N | Y | 20.00 | 05-Aug-21 | 10-Aug-21 | 13-Aug-21 | 23-Aug-21 |
| C19IMPACT_1501 | Saint Kitts and Nevis  | 25-Jul-21 | CARPHA | N | N | N | N | N | Y | 14.96 | 06-Aug-21 | 12-Aug-21 | 13-Aug-21 | 21-Jan-22 |
| C19IMPACT_1502 | Saint Kitts and Nevis  | 26-Jul-21 | CARPHA | N | N | N | N | N | Y | 11.47 | 06-Aug-21 | 12-Aug-21 | 13-Aug-21 | 21-Jan-22 |
| C19IMPACT_1503 | Trinidad and Tobago    | 30-Jul-21 | MoH    | Y | N | Y | N | N | Y | 18.00 | 05-Aug-21 | 12-Aug-21 | 13-Aug-21 | 21-Jan-22 |
| C19IMPACT_1504 | Trinidad and Tobago    | 30-Jul-21 | MoH    | Y | N | Y | N | Y | Y | 19.00 | 05-Aug-21 | 12-Aug-21 | 13-Aug-21 | 21-Jan-22 |
| C19IMPACT_1505 | Trinidad and Tobago    | 30-Jul-21 | MoH    | N | N | N | N | Y | Y | 16.00 | 05-Aug-21 | 12-Aug-21 | 13-Aug-21 | 21-Jan-22 |
| C19IMPACT_1506 | Trinidad and Tobago    | 30-Jul-21 | MoH    | N | N | N | N | N | N | 16.00 | 05-Aug-21 | 12-Aug-21 | 13-Aug-21 | 21-Jan-22 |
| C19IMPACT_1507 | Trinidad and Tobago    | 30-Jul-21 | MoH    | N | N | N | N | N | N | 17.00 | 05-Aug-21 | 12-Aug-21 | 13-Aug-21 | 21-Jan-22 |
| C19IMPACT_1508 | Trinidad and Tobago    | 31-Jul-21 | MoH    | Y | N | Y | N | N | Y | 19.00 | 05-Aug-21 | 12-Aug-21 | 13-Aug-21 | 21-Jan-22 |
| C19IMPACT_1509 | Trinidad and Tobago    | 03-Aug-21 | MoH    | N | N | N | N | Y | Y | 14.00 | 06-Aug-21 | 12-Aug-21 | 13-Aug-21 |           |
| C19IMPACT_1510 | Trinidad and Tobago    | 03-Aug-21 | MoH    | N | N | N | N | N | Y | 14.00 | 06-Aug-21 | 12-Aug-21 | 13-Aug-21 |           |
| C19IMPACT_1511 | Trinidad and Tobago    | 03-Aug-21 | MoH    | N | N | N | N | N | Y | 15.00 | 06-Aug-21 | 12-Aug-21 | 13-Aug-21 |           |
| C19IMPACT_1512 | Trinidad and Tobago    | 03-Aug-21 | MoH    | N | N | N | N | N | Y | 14.00 | 06-Aug-21 | 12-Aug-21 | 13-Aug-21 | 21-Jan-22 |
| C19IMPACT_1513 | Trinidad and Tobago    | 03-Aug-21 | CARPHA | N | N | N | N | N | Y | 26.42 | 06-Aug-21 | 12-Aug-21 | 13-Aug-21 | 13-Aug-21 |
| C19IMPACT_1514 | Trinidad and Tobago    | 03-Aug-21 | CARPHA | N | N | N | N | N | Y | 17.55 | 06-Aug-21 | 12-Aug-21 | 13-Aug-21 | 21-Jan-22 |
| C19IMPACT_1515 | Trinidad and Tobago    | 03-Aug-21 | CARPHA | N | N | N | N | N | Y | 22.31 | 06-Aug-21 | 12-Aug-21 | 13-Aug-21 | 21-Jan-22 |
| C19IMPACT_1516 | Trinidad and Tobago    | 03-Aug-21 | CARPHA | Y | N | Y | N | Y | Y | 18.99 | 06-Aug-21 | 12-Aug-21 | 13-Aug-21 | 21-Jan-22 |
| C19IMPACT_1517 | Trinidad and Tobago    | 03-Aug-21 | CARPHA | N | N | Y | N | Y | Y | 19.64 | 06-Aug-21 | 12-Aug-21 | 13-Aug-21 | 21-Jan-22 |
| C19IMPACT_1518 | Trinidad and Tobago    | 03-Aug-21 | CARPHA | N | N | N | N | Y | Y | 21.62 | 06-Aug-21 | 12-Aug-21 | 13-Aug-21 | 21-Jan-22 |
| C19IMPACT_1519 | Trinidad and Tobago    | 04-Aug-21 | MoH    | N | N | N | N | N | Y | 16.00 | 06-Aug-21 | 12-Aug-21 | 13-Aug-21 |           |
| C19IMPACT_1520 | Trinidad and Tobago    | 04-Aug-21 | MoH    | N | N | N | N | N | Y | 19.00 | 06-Aug-21 | 12-Aug-21 | 13-Aug-21 | 21-Jan-22 |
| C19IMPACT_1521 | Trinidad and Tobago    | 04-Aug-21 | MoH    | N | N | N | N | N | Y | 18.00 | 06-Aug-21 | 12-Aug-21 | 13-Aug-21 | 21-Jan-22 |
| C19IMPACT_1522 | Trinidad and Tobago    | 04-Aug-21 | MoH    | Y | N | Y | N | N | Y | 19.00 | 06-Aug-21 | 12-Aug-21 | 13-Aug-21 | 21-Jan-22 |
| C19IMPACT_1523 | Trinidad and Tobago    | 04-Aug-21 | MoH    | N | N | N | N | Y | Y | 17.00 | 06-Aug-21 | 12-Aug-21 | 13-Aug-21 | 21-Jan-22 |
| C19IMPACT_1524 | Trinidad and Tobago    | 04-Aug-21 | MoH    | Y | N | Y | N | N | Y | 19.00 | 06-Aug-21 | 12-Aug-21 | 13-Aug-21 | 21-Jan-22 |
| C19IMPACT_1525 | Trinidad and Tobago    | 04-Aug-21 | MoH    | Y | N | Y | N | Y | Y | 17.00 | 06-Aug-21 | 12-Aug-21 | 13-Aug-21 | 21-Jan-22 |
| C19IMPACT_1526 | Trinidad and Tobago    | 04-Aug-21 | MoH    | Y | N | Y | N | Y | Y | 19.00 | 06-Aug-21 | 12-Aug-21 | 13-Aug-21 | 21-Jan-22 |
| C19IMPACT_1527 | Trinidad and Tobago    | 04-Aug-21 | MoH    | N | N | Y | N | Y | Y | 16.00 | 06-Aug-21 | 12-Aug-21 | 13-Aug-21 | 21-Jan-22 |
| C19IMPACT_1528 | Trinidad and Tobago    | 04-Aug-21 | MoH    | N | N | N | N | N | Y | 15.00 | 06-Aug-21 | 12-Aug-21 | 13-Aug-21 |           |
| C19IMPACT_1529 | Trinidad and Tobago    | 04-Aug-21 | MoH    | N | N | N | N | Y | Y | 18.00 | 06-Aug-21 | 12-Aug-21 | 13-Aug-21 | 21-Jan-22 |
| C19IMPACT_1530 | Trinidad and Tobago    | 04-Aug-21 | MoH    | N | N | N | N | N | Y | 15.00 | 06-Aug-21 | 12-Aug-21 | 13-Aug-21 | 21-Jan-22 |
| C19IMPACT_1531 | Trinidad and Tobago    | 05-Aug-21 | MoH    | N | N | N | N | N | Y | 19.00 | 06-Aug-21 | 12-Aug-21 | 13-Aug-21 | 21-Jan-22 |
| C19IMPACT_1532 | Trinidad and Tobago    | 05-Aug-21 | MoH    | N | N | N | N | N | Y | 12.90 | 10-Aug-21 | 12-Aug-21 | 13-Aug-21 |           |





|                |                                  |           |        |   |   |   |   |   |   |       |       |           |           |           |           |            |
|----------------|----------------------------------|-----------|--------|---|---|---|---|---|---|-------|-------|-----------|-----------|-----------|-----------|------------|
| C19IMPACT_1661 | Anguilla                         | 04-Aug-21 | CARPHA | N | N | N | N | N | N | 16.67 |       | 13-Aug-21 | 19-Aug-21 |           | 23-Aug-21 | 08-Sept-21 |
| C19IMPACT_1662 | Trinidad and Tobago              | 04-Aug-21 | MoH    | N | N | N | N | N | N | 19.00 |       | 13-Aug-21 | 19-Aug-21 | 27-Aug-21 |           | 09-Sept-21 |
| C19IMPACT_1663 | Antigua and Barbuda              | 05-Aug-21 | CARPHA | N | N | N | N | N | N | 19.37 |       | 13-Aug-21 | 19-Aug-21 |           | 23-Aug-21 | 08-Sept-21 |
| C19IMPACT_1664 | Antigua and Barbuda              | 05-Aug-21 | CARPHA | N | N | N | N | N | N | 20.77 |       | 13-Aug-21 | 19-Aug-21 |           | 23-Aug-21 | 08-Sept-21 |
| C19IMPACT_1665 | Antigua and Barbuda              | 05-Aug-21 | CARPHA | N | N | N | N | N | N | 19.49 |       | 13-Aug-21 | 19-Aug-21 |           | 23-Aug-21 | 08-Sept-21 |
| C19IMPACT_1666 | Antigua and Barbuda              | 05-Aug-21 | CARPHA | N | N | N | N | N | N | 19.36 |       | 13-Aug-21 | 19-Aug-21 |           | 23-Aug-21 | 08-Sept-21 |
| C19IMPACT_1667 | Antigua and Barbuda              | 05-Aug-21 | CARPHA | N | N | N | N | N | N | 20.50 |       | 13-Aug-21 | 19-Aug-21 |           | 23-Aug-21 | 08-Sept-21 |
| C19IMPACT_1668 | Trinidad and Tobago              | 05-Aug-21 | MoH    | N | N | N | N | N | N |       |       | 13-Aug-21 | 19-Aug-21 | 27-Aug-21 |           | 09-Sept-21 |
| C19IMPACT_1669 | Antigua and Barbuda              | 06-Aug-21 | CARPHA | N | N | N | N | N | N | 18.66 |       | 13-Aug-21 | 19-Aug-21 |           | 23-Aug-21 | 08-Sept-21 |
| C19IMPACT_1670 | Antigua and Barbuda              | 06-Aug-21 | CARPHA | N | N | N | N | N | N | 17.69 |       | 13-Aug-21 | 19-Aug-21 |           | 23-Aug-21 | 08-Sept-21 |
| C19IMPACT_1671 | Antigua and Barbuda              | 06-Aug-21 | CARPHA | N | N | N | N | N | N | 18.90 |       | 13-Aug-21 | 19-Aug-21 |           | 23-Aug-21 | 08-Sept-21 |
| C19IMPACT_1672 | Trinidad and Tobago              | 06-Aug-21 | MoH    | N | N | N | N | N | Y |       | 11.00 | 16-Aug-21 | 19-Aug-21 | 27-Aug-21 |           | 09-Sept-21 |
| C19IMPACT_1673 | Antigua and Barbuda              | 06-Aug-21 | CARPHA | N | N | N | N | N | N | 17.25 |       | 13-Aug-21 | 19-Aug-21 |           | 23-Aug-21 | 09-Sept-21 |
| C19IMPACT_1674 | Antigua and Barbuda              | 06-Aug-21 | CARPHA | N | N | N | N | N | N | 24.05 |       | 13-Aug-21 | 19-Aug-21 |           | 23-Aug-21 | 09-Sept-21 |
| C19IMPACT_1675 | Trinidad and Tobago              | 06-Aug-21 | MoH    | N | N | N | N | N | Y |       |       | 13-Aug-21 | 19-Aug-21 | 29-Oct-21 |           | 21-Jan-22  |
| C19IMPACT_1676 | Trinidad and Tobago              | 06-Aug-21 | MoH    | N | N | N | N | N | N |       |       | 13-Aug-21 | 19-Aug-21 | 29-Oct-21 |           | 21-Jan-22  |
| C19IMPACT_1677 | Trinidad and Tobago              | 07-Aug-21 | CARPHA | N | N | Y | N | N | N | 14.71 |       | 13-Aug-21 | 19-Aug-21 | 27-Aug-21 | 23-Aug-21 | 08-Sept-21 |
| C19IMPACT_1678 | Trinidad and Tobago              | 07-Aug-21 | MoH    | N | N | N | N | N | Y |       | 4.00  | 16-Aug-21 | 19-Aug-21 | 27-Aug-21 |           | 09-Sept-21 |
| C19IMPACT_1679 | Trinidad and Tobago              | 07-Aug-21 | CARPHA | N | N | N | N | N | N | 14.84 |       | 13-Aug-21 | 19-Aug-21 | 27-Aug-21 | 23-Aug-21 | 09-Sept-21 |
| C19IMPACT_1680 | Saint Vincent and the Grenadines | 08-Aug-21 | CARPHA | N | N | N | N | N | N | 15.90 |       | 13-Aug-21 | 19-Aug-21 |           | 23-Aug-21 | 08-Sept-21 |
| C19IMPACT_1681 | Trinidad and Tobago              | 08-Aug-21 | MoH    | N | N | N | N | N | Y | 20.70 |       | 13-Aug-21 | 19-Aug-21 | 27-Aug-21 |           |            |
| C19IMPACT_1682 | Trinidad and Tobago              | 08-Aug-21 | MoH    | N | N | N | N | N | Y | 15.60 |       | 13-Aug-21 | 19-Aug-21 | 27-Aug-21 |           | 09-Sept-21 |
| C19IMPACT_1683 | Trinidad and Tobago              | 08-Aug-21 | MoH    | N | N | N | N | N | N |       |       | 13-Aug-21 | 19-Aug-21 | 27-Aug-21 |           |            |
| C19IMPACT_1684 | Trinidad and Tobago              | 08-Aug-21 | MoH    | N | N | N | N | N | N |       |       | 13-Aug-21 | 19-Aug-21 | 27-Aug-21 |           | 09-Sept-21 |
| C19IMPACT_1685 | Trinidad and Tobago              | 08-Aug-21 | MoH    | N | N | N | N | N | N |       | 5.70  | 13-Aug-21 | 19-Aug-21 | 27-Aug-21 |           | 09-Sept-21 |
| C19IMPACT_1686 | Trinidad and Tobago              | 08-Aug-21 | MoH    | N | N | N | N | N | N |       |       | 13-Aug-21 | 19-Aug-21 | 27-Aug-21 |           | 09-Sept-21 |
| C19IMPACT_1687 | Trinidad and Tobago              | 08-Aug-21 | MoH    | N | N | N | N | N | Y |       | 3.29  | 13-Aug-21 | 19-Aug-21 | 27-Aug-21 |           | 09-Sept-21 |
| C19IMPACT_1688 | Trinidad and Tobago              | 08-Aug-21 | MoH    | N | N | N | N | N | Y | 20.00 |       | 13-Aug-21 | 19-Aug-21 | 27-Aug-21 |           |            |
| C19IMPACT_1689 | Saint Vincent and the Grenadines | 09-Aug-21 | CARPHA | N | N | N | N | N | N | 15.00 |       | 13-Aug-21 | 19-Aug-21 |           | 23-Aug-21 | 08-Sept-21 |
| C19IMPACT_1690 | Anguilla                         | 09-Aug-21 | CARPHA | N | N | N | N | N | N | 22.42 |       | 13-Aug-21 | 19-Aug-21 |           | 23-Aug-21 |            |
| C19IMPACT_1691 | Anguilla                         | 09-Aug-21 | CARPHA | N | N | N | N | N | N | 17.30 |       | 13-Aug-21 | 19-Aug-21 |           | 23-Aug-21 |            |
| C19IMPACT_1692 | Anguilla                         | 09-Aug-21 | CARPHA | N | N | N | N | N | N | 15.86 |       | 13-Aug-21 | 19-Aug-21 |           | 23-Aug-21 | 08-Sept-21 |
| C19IMPACT_1693 | Trinidad and Tobago              | 09-Aug-21 | CARPHA | N | N | N | N | N | N | 19.92 |       | 13-Aug-21 | 19-Aug-21 | 27-Aug-21 | 23-Aug-21 | 09-Sept-21 |
| C19IMPACT_1694 | Trinidad and Tobago              | 09-Aug-21 | CARPHA | N | N | N | N | N | N | 14.22 |       | 13-Aug-21 | 19-Aug-21 | 27-Aug-21 | 23-Aug-21 | 09-Sept-21 |
| C19IMPACT_1695 | Trinidad and Tobago              | 09-Aug-21 | CARPHA | N | N | N | N | N | N | 16.39 |       | 13-Aug-21 | 19-Aug-21 | 27-Aug-21 | 23-Aug-21 | 09-Sept-21 |
| C19IMPACT_1696 | Trinidad and Tobago              | 09-Aug-21 | CARPHA | N | N | Y | N | N | N | 16.12 |       | 13-Aug-21 | 19-Aug-21 | 27-Aug-21 | 23-Aug-21 | 09-Sept-21 |
| C19IMPACT_1697 | Trinidad and Tobago              | 09-Aug-21 | MoH    | N | N | N | Y | Y | Y |       | 13.10 | 13-Aug-21 | 19-Aug-21 | 27-Aug-21 |           | 09-Sept-21 |
| C19IMPACT_1698 | Trinidad and Tobago              | 09-Aug-21 | MoH    | N | Y | Y | N | N | N | 18.00 |       | 13-Aug-21 | 19-Aug-21 | 27-Aug-21 |           | 09-Sept-21 |
| C19IMPACT_1699 | Trinidad and Tobago              | 09-Aug-21 | MoH    | N | N | N | N | Y | N |       |       | 13-Aug-21 | 19-Aug-21 | 27-Aug-21 |           | 09-Sept-21 |
| C19IMPACT_1700 | Trinidad and Tobago              | 09-Aug-21 | MoH    | N | N | N | N | N | Y |       | 4.73  | 13-Aug-21 | 19-Aug-21 | 27-Aug-21 |           | 09-Sept-21 |
| C19IMPACT_1701 | Trinidad and Tobago              | 10-Aug-21 | MoH    | N | N | N | N | N | Y | 17.00 |       | 13-Aug-21 | 19-Aug-21 | 27-Aug-21 |           | 09-Sept-21 |
| C19IMPACT_1702 | Trinidad and Tobago              | 10-Aug-21 | MoH    | Y | N | Y | N | N | N | 17.00 |       | 13-Aug-21 | 19-Aug-21 | 27-Aug-21 |           | 08-Sept-21 |
| C19IMPACT_1703 | Trinidad and Tobago              | 10-Aug-21 | MoH    | N | N | N | N | Y | Y | 15.00 |       | 13-Aug-21 | 19-Aug-21 | 27-Aug-21 |           | 09-Sept-21 |
| C19IMPACT_1704 | Trinidad and Tobago              | 10-Aug-21 | MoH    | N | N | N | N | N | Y |       | 5.41  | 13-Aug-21 | 19-Aug-21 | 27-Aug-21 |           | 09-Sept-21 |
| C19IMPACT_1705 | Trinidad and Tobago              | 10-Aug-21 | MoH    | N | N | N | N | N | N | 19.00 |       | 13-Aug-21 | 19-Aug-21 | 27-Aug-21 |           | 09-Sept-21 |
| C19IMPACT_1706 | Trinidad and Tobago              | 10-Aug-21 | MoH    | N | N | N | N | N | Y | 15.00 |       | 13-Aug-21 | 19-Aug-21 | 27-Aug-21 |           | 09-Sept-21 |
| C19IMPACT_1707 | Trinidad and Tobago              | 11-Aug-21 | MoH    | N | N | N | N | N | Y | 19.60 |       | 16-Aug-21 | 19-Aug-21 | 27-Aug-21 |           |            |
| C19IMPACT_1708 | Trinidad and Tobago              | 11-Aug-21 | MoH    | N | N | N | N | N | Y | 17.70 |       | 16-Aug-21 | 19-Aug-21 | 27-Aug-21 |           |            |
| C19IMPACT_1709 | Trinidad and Tobago              | 11-Aug-21 | MoH    | N | N | N | N | N | Y | 15.40 |       | 16-Aug-21 | 19-Aug-21 | 27-Aug-21 |           |            |
| C19IMPACT_1710 | Trinidad and Tobago              | 11-Aug-21 | MoH    | N | N | N | N | N | Y | 18.90 |       | 16-Aug-21 | 19-Aug-21 | 27-Aug-21 |           | 09-Sept-21 |
| C19IMPACT_1711 | Trinidad and Tobago              | 11-Aug-21 | MoH    | N | N | Y | N | N | N | 17.03 |       | 13-Aug-21 | 19-Aug-21 | 27-Aug-21 |           | 09-Sept-21 |
| C19IMPACT_1712 | Trinidad and Tobago              | 11-Aug-21 | MoH    | Y | Y | Y | Y | Y | N | 19.67 |       | 13-Aug-21 | 19-Aug-21 | 27-Aug-21 |           | 09-Sept-21 |
| C19IMPACT_1713 | Trinidad and Tobago              | 11-Aug-21 | MoH    | Y | N | Y | N | Y | N | 17.00 |       | 13-Aug-21 | 19-Aug-21 | 27-Aug-21 |           | 09-Sept-21 |
| C19IMPACT_1714 | Trinidad and Tobago              | 11-Aug-21 | MoH    | Y | Y | Y | N | Y | N | 18.88 |       | 13-Aug-21 | 19-Aug-21 | 27-Aug-21 |           | 09-Sept-21 |
| C19IMPACT_1715 | Trinidad and Tobago              | 11-Aug-21 | MoH    | N | N | N | N | Y | N | 19.47 |       | 13-Aug-21 | 19-Aug-21 | 29-Oct-21 |           | 21-Jan-22  |
| C19IMPACT_1716 | Trinidad and Tobago              | 12-Aug-21 | MoH    | N | N | N | N | N | N | 18.00 |       | 16-Aug-21 | 19-Aug-21 | 27-Aug-21 |           | 09-Sept-21 |
| C19IMPACT_1717 | Trinidad and Tobago              | 12-Aug-21 | MoH    | N | N | N | N | N | Y | 18.00 |       | 16-Aug-21 | 19-Aug-21 | 27-Aug-21 |           | 09-Sept-21 |
| C19IMPACT_1718 | Trinidad and Tobago              | 09-Aug-21 | MoH    | N | N | N | N | N | Y |       | 8.00  | 16-Aug-21 | 23-Aug-21 | 27-Aug-21 |           | 21-Jan-22  |
| C19IMPACT_1719 | Trinidad and Tobago              | 09-Aug-21 | CARPHA | N | N | N | N | N | Y | 25.57 |       | 13-Aug-21 | 23-Aug-21 | 27-Aug-21 | 26-Aug-21 |            |
| C19IMPACT_1720 | Trinidad and Tobago              | 09-Aug-21 | CARPHA | N | N | N | N | N | Y | 14.99 |       | 13-Aug-21 | 23-Aug-21 | 27-Aug-21 | 26-Aug-21 |            |
| C19IMPACT_1721 | Trinidad and Tobago              | 09-Aug-21 | MoH    | N | N | N | N | N | Y | 18.50 |       | 16-Aug-21 | 23-Aug-21 | 27-Aug-21 |           | 21-Jan-22  |
| C19IMPACT_1722 | Trinidad and Tobago              | 10-Aug-21 | MoH    | N | N | N | N | N | Y | 17.90 |       | 16-Aug-21 | 23-Aug-21 | 27-Aug-21 |           | 21-Jan-22  |
| C19IMPACT_1723 | Grenada                          | 10-Aug-21 | CARPHA | N | N | N | N | N | Y | 17.16 |       | 17-Aug-21 | 23-Aug-21 |           | 26-Aug-21 | 21-Jan-22  |
| C19IMPACT_1724 | Grenada                          | 10-Aug-21 | CARPHA | N | N | N | N | N | Y | 21.80 |       | 17-Aug-21 | 23-Aug-21 |           | 26-Aug-21 | 21-Jan-22  |

















|                |                                  |            |        |   |   |   |   |   |   |       |       |            |            |            |            |           |
|----------------|----------------------------------|------------|--------|---|---|---|---|---|---|-------|-------|------------|------------|------------|------------|-----------|
| C19IMPACT_2237 | Trinidad and Tobago              |            | MoH    | N | N | N | N | N | Y |       |       | 08-Sept-21 | 22-Sept-21 | 25-Sept-21 |            |           |
| C19IMPACT_2238 | Barbados                         | 22-Jul-21  | CARPHA | N | N | N | N | N | N | 20.40 |       | 08-Sept-21 | 23-Sept-21 |            | 28-Sept-21 | 17-Dec-21 |
| C19IMPACT_2239 | Barbados                         | 26-Jul-21  | CARPHA | N | N | N | N | N | N | 23.88 |       | 08-Sept-21 | 23-Sept-21 |            | 28-Sept-21 | 17-Dec-21 |
| C19IMPACT_2240 | Barbados                         | 28-Jul-21  | CARPHA | N | N | N | N | N | N | 21.29 |       | 08-Sept-21 | 23-Sept-21 |            | 28-Sept-21 | 17-Dec-21 |
| C19IMPACT_2241 | Barbados                         | 29-Jul-21  | CARPHA | N | N | N | N | N | N | 16.49 |       | 08-Sept-21 | 23-Sept-21 |            | 28-Sept-21 | 17-Dec-21 |
| C19IMPACT_2242 | Barbados                         | 31-Jul-21  | CARPHA | N | N | N | N | N | N | 25.71 |       | 08-Sept-21 | 23-Sept-21 |            | 28-Sept-21 | 17-Dec-21 |
| C19IMPACT_2243 | Barbados                         | 01-Aug-21  | CARPHA | N | N | N | N | N | N | 20.03 |       | 08-Sept-21 | 23-Sept-21 |            | 28-Sept-21 | 17-Dec-21 |
| C19IMPACT_2244 | Barbados                         | 01-Aug-21  | CARPHA | N | N | N | N | N | N | 15.91 |       | 08-Sept-21 | 23-Sept-21 |            | 28-Sept-21 | 17-Dec-21 |
| C19IMPACT_2245 | Barbados                         | 01-Aug-21  | CARPHA | N | N | N | N | N | N | 24.98 |       | 08-Sept-21 | 23-Sept-21 |            | 28-Sept-21 | 17-Dec-21 |
| C19IMPACT_2246 | Barbados                         | 01-Aug-21  | CARPHA | N | N | N | N | N | N | 19.95 |       | 08-Sept-21 | 23-Sept-21 |            | 28-Sept-21 | 17-Dec-21 |
| C19IMPACT_2247 | Barbados                         | 02-Aug-21  | CARPHA | N | N | N | N | N | N | 13.05 |       | 08-Sept-21 | 23-Sept-21 |            | 28-Sept-21 | 17-Dec-21 |
| C19IMPACT_2248 | Trinidad and Tobago              | 13-Aug-21  | CARPHA | N | N | N | N | N | N | 16.79 |       | 08-Sept-21 | 23-Sept-21 | 25-Sept-21 |            | 17-Dec-21 |
| C19IMPACT_2249 | Trinidad and Tobago              | 15-Aug-21  | CARPHA | N | N | N | N | N | N | 23.35 |       | 08-Sept-21 | 23-Sept-21 | 25-Sept-21 |            | 17-Dec-21 |
| C19IMPACT_2250 | Trinidad and Tobago              | 15-Aug-21  | CARPHA | N | N | N | N | N | N | 20.15 |       | 08-Sept-21 | 23-Sept-21 | 25-Sept-21 |            | 17-Dec-21 |
| C19IMPACT_2251 | Grenada                          | 18-Aug-21  | CARPHA | N | N | N | N | N | N | 21.28 |       | 10-Sept-21 | 23-Sept-21 |            | 25-Sept-21 | 17-Dec-21 |
| C19IMPACT_2252 | Grenada                          | 18-Aug-21  | CARPHA | N | N | N | N | N | N | 14.22 |       | 10-Sept-21 | 23-Sept-21 |            | 30-Sept-21 | 17-Dec-21 |
| C19IMPACT_2253 | Grenada                          | 19-Aug-21  | CARPHA | N | N | N | N | N | N | 27.77 |       | 10-Sept-21 | 23-Sept-21 |            | 25-Sept-21 | 17-Dec-21 |
| C19IMPACT_2254 | Grenada                          | 19-Aug-21  | CARPHA | N | N | N | N | N | N | 15.99 |       | 10-Sept-21 | 23-Sept-21 |            | 25-Sept-21 | 17-Dec-21 |
| C19IMPACT_2255 | Antigua and Barbuda              | 21-Aug-21  | CARPHA | N | N | N | N | N | N | 12.90 |       | 10-Sept-21 | 23-Sept-21 |            | 30-Sept-21 | 17-Dec-21 |
| C19IMPACT_2256 | Antigua and Barbuda              | 22-Aug-21  | CARPHA | N | N | N | N | N | N | 20.69 |       | 10-Sept-21 | 23-Sept-21 |            | 30-Sept-21 | 17-Dec-21 |
| C19IMPACT_2257 | Antigua and Barbuda              | 23-Aug-21  | CARPHA | N | N | N | N | N | N | 15.77 |       | 10-Sept-21 | 23-Sept-21 |            | 30-Sept-21 | 17-Dec-21 |
| C19IMPACT_2258 | Grenada                          | 25-Aug-21  | CARPHA | N | N | N | N | N | N | 15.82 |       | 10-Sept-21 | 23-Sept-21 |            | 25-Sept-21 | 17-Dec-21 |
| C19IMPACT_2259 | Montserrat                       | 27-Aug-21  | CARPHA | N | N | N | N | N | N | 13.65 |       | 08-Sept-21 | 23-Sept-21 |            | 28-Sept-21 | 17-Dec-21 |
| C19IMPACT_2260 | Saint Vincent and the Grenadines | 28-Aug-21  | CARPHA | N | N | N | N | N | N | 17.42 |       | 08-Sept-21 | 23-Sept-21 |            | 28-Sept-21 | 17-Dec-21 |
| C19IMPACT_2261 | Montserrat                       | 28-Aug-21  | CARPHA | N | N | N | N | N | N | 16.01 |       | 08-Sept-21 | 23-Sept-21 |            | 28-Sept-21 | 17-Dec-21 |
| C19IMPACT_2262 | Trinidad and Tobago              | 29-Aug-21  | MoH    | N | N | N | N | N | N |       | 9.00  | 08-Sept-21 | 23-Sept-21 | 29-Oct-21  |            | 17-Dec-21 |
| C19IMPACT_2263 | Trinidad and Tobago              | 30-Aug-21  | MoH    | N | N | N | N | N | N |       | 14.00 | 08-Sept-21 | 23-Sept-21 | 29-Oct-21  |            | 17-Dec-21 |
| C19IMPACT_2264 | Trinidad and Tobago              | 31-Aug-21  | MoH    | N | N | N | N | N | N |       | 3.00  | 08-Sept-21 | 23-Sept-21 | 29-Oct-21  |            | 17-Dec-21 |
| C19IMPACT_2265 | Saint Vincent and the Grenadines | 31-Aug-21  | CARPHA | N | N | N | N | N | N | 15.47 |       | 10-Sept-21 | 23-Sept-21 |            | 25-Sept-21 | 17-Dec-21 |
| C19IMPACT_2266 | Saint Vincent and the Grenadines | 31-Aug-21  | CARPHA | N | N | N | N | N | N | 14.45 |       | 10-Sept-21 | 23-Sept-21 |            | 25-Sept-21 | 17-Dec-21 |
| C19IMPACT_2267 | Grenada                          | 31-Aug-21  | CARPHA | N | N | N | N | N | N | 14.43 |       | 20-Sept-21 | 23-Sept-21 |            | 30-Sept-21 | 17-Dec-21 |
| C19IMPACT_2268 | Trinidad and Tobago              | 02-Sept-21 | MoH    | N | N | N | N | N | Y |       | 5.24  | 10-Sept-21 | 23-Sept-21 | 25-Sept-21 |            | 17-Dec-21 |
| C19IMPACT_2269 | Trinidad and Tobago              | 02-Sept-21 | MoH    | N | N | N | N | N | Y |       | 6.32  | 10-Sept-21 | 23-Sept-21 | 25-Sept-21 |            | 17-Dec-21 |
| C19IMPACT_2270 | Trinidad and Tobago              | 02-Sept-21 | MoH    | N | N | N | N | N | Y |       | 5.27  | 10-Sept-21 | 23-Sept-21 | 29-Oct-21  |            | 17-Dec-21 |
| C19IMPACT_2271 | Trinidad and Tobago              | 03-Sept-21 | MoH    | N | N | N | N | N | N | 15.00 |       | 08-Sept-21 | 23-Sept-21 | 29-Oct-21  |            | 17-Dec-21 |
| C19IMPACT_2272 | Trinidad and Tobago              | 03-Sept-21 | MoH    | N | N | N | N | N | N |       | 5.00  | 08-Sept-21 | 23-Sept-21 | 29-Oct-21  |            | 17-Dec-21 |
| C19IMPACT_2273 | Trinidad and Tobago              | 03-Sept-21 | MoH    | N | N | N | N | N | Y |       | 8.96  | 10-Sept-21 | 23-Sept-21 | 25-Sept-21 |            | 17-Dec-21 |
| C19IMPACT_2274 | Trinidad and Tobago              | 03-Sept-21 | MoH    | N | N | N | N | N | Y |       | 6.92  | 10-Sept-21 | 23-Sept-21 | 25-Sept-21 |            | 17-Dec-21 |
| C19IMPACT_2275 | Grenada                          | 03-Sept-21 | CARPHA | N | N | N | N | N | N | 19.46 |       | 20-Sept-21 | 23-Sept-21 |            | 30-Sept-21 | 17-Dec-21 |
| C19IMPACT_2276 | Grenada                          | 03-Sept-21 | CARPHA | N | N | N | N | N | N | 19.52 |       | 20-Sept-21 | 23-Sept-21 |            | 30-Sept-21 | 17-Dec-21 |
| C19IMPACT_2277 | Trinidad and Tobago              | 03-Sept-21 | MoH    | N | N | N | N | N | Y |       | 15.36 | 10-Sept-21 | 23-Sept-21 | 29-Oct-21  |            | 17-Dec-21 |
| C19IMPACT_2278 | Trinidad and Tobago              | 04-Sept-21 | MoH    | N | N | N | N | N | N | 9.00  |       | 08-Sept-21 | 23-Sept-21 | 29-Oct-21  |            | 17-Dec-21 |
| C19IMPACT_2279 | Trinidad and Tobago              | 04-Sept-21 | MoH    | N | N | N | N | N | N |       | 6.00  | 08-Sept-21 | 23-Sept-21 | 29-Oct-21  |            | 17-Dec-21 |
| C19IMPACT_2280 | Trinidad and Tobago              | 04-Sept-21 | MoH    | N | N | N | N | N | N |       | 8.00  | 08-Sept-21 | 23-Sept-21 | 29-Oct-21  |            | 17-Dec-21 |
| C19IMPACT_2281 | Trinidad and Tobago              | 04-Sept-21 | MoH    | N | N | N | N | N | Y |       | 10.40 | 10-Sept-21 | 23-Sept-21 | 25-Sept-21 |            | 17-Dec-21 |
| C19IMPACT_2282 | Trinidad and Tobago              | 04-Sept-21 | MoH    | N | N | N | N | N | Y |       | 6.44  | 10-Sept-21 | 23-Sept-21 | 25-Sept-21 |            | 17-Dec-21 |
| C19IMPACT_2283 | Trinidad and Tobago              | 06-Sept-21 | MoH    | N | N | N | N | N | N | 15.00 |       | 08-Sept-21 | 23-Sept-21 | 29-Oct-21  |            | 17-Dec-21 |
| C19IMPACT_2284 | Trinidad and Tobago              | 06-Sept-21 | CARPHA | N | N | N | N | N | N | 15.90 |       | 10-Sept-21 | 23-Sept-21 | 25-Sept-21 | 25-Sept-21 |           |
| C19IMPACT_2285 | Trinidad and Tobago              | 06-Sept-21 | CARPHA | N | N | N | N | N | N | 19.06 |       | 10-Sept-21 | 23-Sept-21 | 25-Sept-21 | 25-Sept-21 |           |
| C19IMPACT_2286 | Trinidad and Tobago              | 06-Sept-21 | CARPHA | N | N | N | N | N | N | 15.01 |       | 10-Sept-21 | 23-Sept-21 | 25-Sept-21 | 25-Sept-21 |           |
| C19IMPACT_2287 | Trinidad and Tobago              | 06-Sept-21 | MoH    | N | N | N | N | N | N | 17.50 |       | 10-Sept-21 | 23-Sept-21 | 25-Sept-21 |            |           |
| C19IMPACT_2288 | Trinidad and Tobago              | 06-Sept-21 | MoH    | N | N | N | N | N | N | 13.40 |       | 10-Sept-21 | 23-Sept-21 | 25-Sept-21 |            |           |
| C19IMPACT_2289 | Trinidad and Tobago              | 06-Sept-21 | MoH    | N | N | N | N | N | N |       | 4.00  | 10-Sept-21 | 23-Sept-21 | 25-Sept-21 |            | 17-Dec-21 |
| C19IMPACT_2290 | Trinidad and Tobago              | 06-Sept-21 | CARPHA | N | N | N | N | N | N | 17.23 |       | 10-Sept-21 | 23-Sept-21 | 25-Sept-21 | 26-Sept-21 | 17-Dec-21 |
| C19IMPACT_2291 | Trinidad and Tobago              | 06-Sept-21 | CARPHA | N | N | N | N | N | N | 14.72 |       | 10-Sept-21 | 23-Sept-21 | 25-Sept-21 | 26-Sept-21 | 17-Dec-21 |
| C19IMPACT_2292 | Trinidad and Tobago              | 06-Sept-21 | CARPHA | N | N | N | N | N | N | 15.65 |       | 10-Sept-21 | 23-Sept-21 | 25-Sept-21 | 25-Sept-21 | 17-Dec-21 |
| C19IMPACT_2293 | Trinidad and Tobago              | 06-Sept-21 | CARPHA | N | N | N | N | N | N | 21.27 |       | 10-Sept-21 | 23-Sept-21 | 25-Sept-21 | 26-Sept-21 | 17-Dec-21 |
| C19IMPACT_2294 | Trinidad and Tobago              | 06-Sept-21 | MoH    | N | N | N | N | N | N | 14.00 |       | 10-Sept-21 | 23-Sept-21 | 25-Sept-21 |            |           |
| C19IMPACT_2295 | Trinidad and Tobago              | 06-Sept-21 | MoH    | N | N | N | N | N | N | 15.00 |       | 10-Sept-21 | 23-Sept-21 | 25-Sept-21 |            | 17-Dec-21 |
| C19IMPACT_2296 | Trinidad and Tobago              | 06-Sept-21 | MoH    | N | N | N | N | N | N | 16.00 |       | 10-Sept-21 | 23-Sept-21 | 25-Sept-21 |            | 17-Dec-21 |
| C19IMPACT_2297 | Grenada                          | 06-Sept-21 | CARPHA | N | N | N | N | N | N | 15.97 |       | 20-Sept-21 | 23-Sept-21 |            | 30-Sept-21 | 17-Dec-21 |
| C19IMPACT_2298 | Trinidad and Tobago              | 06-Sept-21 | MoH    | N | N | N | N | N | Y | 30.00 |       | 15-Sept-21 | 23-Sept-21 | 01-Oct-21  |            |           |
| C19IMPACT_2299 | Trinidad and Tobago              | 06-Sept-21 | MoH    | N | N | N | N | N | Y | 18.00 |       | 15-Sept-21 | 23-Sept-21 | 01-Oct-21  |            | 17-Dec-21 |
| C19IMPACT_2300 | Trinidad and Tobago              | 06-Sept-21 | MoH    | N | N | N | N | N | Y | 22.00 |       | 15-Sept-21 | 23-Sept-21 | 01-Oct-21  |            | 17-Dec-21 |









































|                |                                  |           |        |   |   |   |   |   |   |       |           |           |           |           |
|----------------|----------------------------------|-----------|--------|---|---|---|---|---|---|-------|-----------|-----------|-----------|-----------|
| C19IMPACT_3581 | Saint Kitts and Nevis            | 19-Dec-21 | CARPHA | N | N | N | N | N | N | 23.04 | 24-Dec-21 | 26-Dec-21 | 26-Dec-21 | 31-Dec-21 |
| C19IMPACT_3582 | Saint Vincent and the Grenadines | 17-Dec-21 | CARPHA | N | N | N | N | N | N | 17.03 | 24-Dec-21 | 26-Dec-21 | 26-Dec-21 | 31-Dec-21 |
| C19IMPACT_3583 | Saint Vincent and the Grenadines | 18-Dec-21 | CARPHA | N | N | N | N | N | N | 19.50 | 24-Dec-21 | 26-Dec-21 | 26-Dec-21 | 31-Dec-21 |
| C19IMPACT_3584 | Saint Vincent and the Grenadines | 20-Dec-21 | CARPHA | N | N | N | N | N | N | 15.66 | 24-Dec-21 | 26-Dec-21 | 26-Dec-21 | 31-Dec-21 |
| C19IMPACT_3585 | Saint Vincent and the Grenadines | 20-Dec-21 | CARPHA | N | N | N | N | N | N | 16.06 | 24-Dec-21 | 26-Dec-21 | 26-Dec-21 | 31-Dec-21 |
| C19IMPACT_3586 | Grenada                          | 13-Dec-21 | CARPHA | N | N | N | N | N | N | 18.41 | 24-Dec-21 | 26-Dec-21 | 26-Dec-21 | 31-Dec-21 |
| C19IMPACT_3587 | Grenada                          | 21-Dec-21 | CARPHA | N | N | N | N | N | N | 26.22 | 24-Dec-21 | 26-Dec-21 | 26-Dec-21 | 31-Dec-21 |
| C19IMPACT_3588 | Grenada                          | 17-Dec-21 | CARPHA | N | N | N | N | N | N | 16.81 | 24-Dec-21 | 26-Dec-21 | 26-Dec-21 | 31-Dec-21 |
| C19IMPACT_3589 | Trinidad and Tobago              | 16-Dec-21 | MoH    | N | N | N | N | N | N | 18.00 | 20-Dec-21 | 30-Dec-21 | 31-Dec-21 | 21-Jan-22 |
| C19IMPACT_3590 | Trinidad and Tobago              | 16-Dec-21 | MoH    | N | N | N | N | N | N | 14.00 | 20-Dec-21 | 30-Dec-21 | 31-Dec-21 | 21-Jan-22 |
| C19IMPACT_3591 | Trinidad and Tobago              | 16-Dec-21 | MoH    | N | N | N | N | N | N | 18.00 | 20-Dec-21 | 30-Dec-21 | 31-Dec-21 | 21-Jan-22 |
| C19IMPACT_3592 | Trinidad and Tobago              | 16-Dec-21 | MoH    | N | N | N | N | N | N | 19.00 | 20-Dec-21 | 30-Dec-21 | 31-Dec-21 | 21-Jan-22 |
| C19IMPACT_3593 | Trinidad and Tobago              | 18-Dec-21 | MoH    | N | N | N | N | N | N | 14.00 | 20-Dec-21 | 30-Dec-21 | 31-Dec-21 | 21-Jan-22 |
| C19IMPACT_3594 | Trinidad and Tobago              | 18-Dec-21 | MoH    | N | N | N | N | N | N | 14.00 | 20-Dec-21 | 30-Dec-21 | 31-Dec-21 | 21-Jan-22 |
| C19IMPACT_3595 | Trinidad and Tobago              | 18-Dec-21 | MoH    | N | N | N | N | N | N | 14.00 | 20-Dec-21 | 30-Dec-21 | 31-Dec-21 | 21-Jan-22 |
| C19IMPACT_3596 | Trinidad and Tobago              | 21-Dec-21 | MoH    | N | N | N | N | N | N | 18.00 | 29-Dec-21 | 30-Dec-21 | 31-Dec-21 | 21-Jan-22 |
| C19IMPACT_3597 | Trinidad and Tobago              | 21-Dec-21 | MoH    | N | N | N | N | N | N | 16.00 | 29-Dec-21 | 30-Dec-21 | 31-Dec-21 | 21-Jan-22 |
| C19IMPACT_3598 | Trinidad and Tobago              | 21-Dec-21 | MoH    | N | N | N | N | N | N | 14.00 | 29-Dec-21 | 30-Dec-21 | 31-Dec-21 | 21-Jan-22 |
| C19IMPACT_3599 | Trinidad and Tobago              | 21-Dec-21 | MoH    | N | N | N | N | N | N | 15.00 | 29-Dec-21 | 30-Dec-21 | 31-Dec-21 | 21-Jan-22 |
| C19IMPACT_3600 | Trinidad and Tobago              | 21-Dec-21 | MoH    | N | N | N | N | N | N | 16.00 | 29-Dec-21 | 30-Dec-21 | 31-Dec-21 | 21-Jan-22 |
| C19IMPACT_3601 | Trinidad and Tobago              | 21-Dec-21 | MoH    | N | N | N | N | N | N | 15.00 | 29-Dec-21 | 30-Dec-21 | 31-Dec-21 | 21-Jan-22 |
| C19IMPACT_3602 | Trinidad and Tobago              | 21-Dec-21 | MoH    | N | N | N | N | N | N | 14.00 | 29-Dec-21 | 30-Dec-21 | 31-Dec-21 | 21-Jan-22 |
| C19IMPACT_3603 | Trinidad and Tobago              | 22-Dec-21 | MoH    | N | N | N | N | N | N | 14.00 | 29-Dec-21 | 30-Dec-21 | 31-Dec-21 | 21-Jan-22 |
| C19IMPACT_3604 | Trinidad and Tobago              | 22-Dec-21 | MoH    | N | N | N | N | N | N | 21.00 | 29-Dec-21 | 30-Dec-21 | 31-Dec-21 | 21-Jan-22 |
| C19IMPACT_3605 | Trinidad and Tobago              | 22-Dec-21 | MoH    | N | N | N | N | N | N | 12.00 | 29-Dec-21 | 30-Dec-21 | 31-Dec-21 | 21-Jan-22 |
| C19IMPACT_3606 | Trinidad and Tobago              | 22-Dec-21 | MoH    | N | N | N | N | N | N | 16.00 | 29-Dec-21 | 30-Dec-21 | 31-Dec-21 | 21-Jan-22 |
| C19IMPACT_3607 | Trinidad and Tobago              | 22-Dec-21 | MoH    | N | N | N | N | N | N | 17.00 | 29-Dec-21 | 30-Dec-21 | 31-Dec-21 | 21-Jan-22 |
| C19IMPACT_3608 | Trinidad and Tobago              | 22-Dec-21 | MoH    | N | N | N | N | N | N | 17.00 | 29-Dec-21 | 30-Dec-21 | 31-Dec-21 | 21-Jan-22 |
| C19IMPACT_3609 | Trinidad and Tobago              | 24-Dec-21 | MoH    | N | N | N | N | N | N | 13.00 | 29-Dec-21 | 30-Dec-21 | 31-Dec-21 | 21-Jan-22 |
| C19IMPACT_3610 | Trinidad and Tobago              | 28-Dec-21 | MoH    | N | N | N | N | N | N | 15.00 | 29-Dec-21 | 30-Dec-21 | 31-Dec-21 | 21-Jan-22 |
